# Supplementary material for: Sustained Helicobacter pylori infection accelerates gastric dysplasia in a mouse model
Source: PubMed Central journal article supplement (PMC7768197; doi:10.26508/lsa.202000967), 2020-12-11
Supplement: LSA-2020-00967_review_history.pdf [file LSA-2020-00967_review_history.pdf]

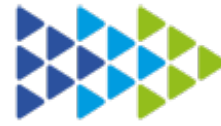

Life Science Alliance

# Sustained *Helicobacter pylori* infection accelerates gastric dysplasia in a mouse model

Valerie O'Brien, Amanda Koehne, Julien Dubrulle, Armando Rodriguez, Christina Leverich, Paul Kong, Jean Campbell, Robert Pierce, James Goldenring, Eunyoung Choi, and Nina Salama

DOI: <https://doi.org/10.26508/lsa.202000967>

*Corresponding author: Nina Salama, Fred Hutchinson Cancer Research Center*

---

|                         |                     |            |
|-------------------------|---------------------|------------|
| <b>Review Timeline:</b> | Submission Date:    | 2020-11-19 |
|                         | Editorial Decision: | 2020-11-20 |
|                         | Revision Received:  | 2020-11-23 |
|                         | Accepted:           | 2020-11-24 |

---

*Scientific Editor: Shachi Bhatt*

## Transaction Report:

(Note: Please note that the manuscript was previously reviewed at another journal and the reports were taken into account in the decision-making process at Life Science Alliance. With the exception of the correction of typographical or spelling errors that could be a source of ambiguity, letters and reports are not edited. The original formatting of letters and referee reports may not be reflected in this compilation.)

November 20, 2020

RE: Life Science Alliance Manuscript #LSA-2020-00967-T

Dr. Nina Salama  
Fred Hutchinson Cancer Research Center  
Seattle

Dear Dr. Salama,

Thank you for submitting your revised manuscript entitled "Sustained *Helicobacter pylori* infection accelerates gastric dysplasia in a mouse model". We would be happy to publish your paper in Life Science Alliance (LSA). pending final revisions as noted below, and necessary to meet our formatting guidelines.

For a brief overview, the manuscript was reviewed at an external, non-Alliance journal, where it was rejected as the reviewers were concerned about conceptual advance. The authors then transferred the revised manuscript, reviewer comments and point-by-point rebuttal to LSA. LSA editors deemed the advance and mechanistic depth to be sufficient, and were satisfied with the revisions that the authors had already done in response to the concerns raised at the previous journal. The manuscript should be publishable at LSA pending the following minor edits,

- + please include the p-Erk1/2 staining results that were shown in response to Rev 2 pt 1, from the pbp rebuttal to the main manuscript. You can add them as supplemental data
- + please add a few lines of discussion on the additive vs. synergistic nature of relationship between HP infection and Kras changes in the manuscript text (response to Rev 2 pt 7)
- + please add the description of why the particular immunology panel was chosen (response to Rev 3 pt 2) to the main manuscript text

Along with the points listed above, please also attend to the following to make sure that the final file complies with LSA's formatting guidelines,

- please consult our Manuscript Preparation Guidelines <https://www.life-science-alliance.org/manuscript-prep> and put your manuscript sections in the correct order
- please add ORCID ID for corresponding author-you should have received instructions on how to do so
- please upload your main and supplementary figures as single files and add a separate section with your figure legends to your manuscript text
- please add the author contributions and a Summary Blurb / Alternate Abstract, to the system
- please add a conflict of interest statement to your manuscript
- please deposit large dataset in a publicly available dataset (<https://www.life-science-alliance.org/manuscript-prep#datadepot>)
- please specify the category of the manuscript as Research Article when submitting the revision

If you are planning a press release on your work, please inform us immediately to allow informing our production team and scheduling a release date.

To upload the final version of your manuscript, please log in to your account:  
<https://lsa.msubmit.net/cgi-bin/main.plex>

You will be guided to complete the submission of your revised manuscript and to fill in all necessary information. Please get in touch in case you do not know or remember your login name.

To avoid unnecessary delays in the acceptance and publication of your paper, please read the following information carefully.

#### A. FINAL FILES:

These items are required for acceptance.

-- An editable version of the final text (.DOC or .DOCX) is needed for copyediting (no PDFs).

-- High-resolution figure, supplementary figure and video files uploaded as individual files: See our detailed guidelines for preparing your production-ready images, <https://www.life-science-alliance.org/authors>

-- Summary blurb (enter in submission system): A short text summarizing in a single sentence the study (max. 200 characters including spaces). This text is used in conjunction with the titles of papers, hence should be informative and complementary to the title. It should describe the context and significance of the findings for a general readership; it should be written in the present tense and refer to the work in the third person. Author names should not be mentioned.

#### B. MANUSCRIPT ORGANIZATION AND FORMATTING:

Full guidelines are available on our Instructions for Authors page, <https://www.life-science-alliance.org/authors>

We encourage our authors to provide original source data, particularly uncropped/-processed electrophoretic blots and spreadsheets for the main figures of the manuscript. If you would like to add source data, we would welcome one PDF/Excel-file per figure for this information. These files will be linked online as supplementary "Source Data" files.

**\*\*Submission of a paper that does not conform to Life Science Alliance guidelines will delay the acceptance of your manuscript.\*\***

**\*\*It is Life Science Alliance policy that if requested, original data images must be made available to the editors. Failure to provide original images upon request will result in unavoidable delays in publication. Please ensure that you have access to all original data images prior to final submission.\*\***

**\*\*The license to publish form must be signed before your manuscript can be sent to production. A link to the electronic license to publish form will be sent to the corresponding author only. Please take a moment to check your funder requirements.\*\***

**\*\*Reviews, decision letters, and point-by-point responses associated with peer-review at Life Science Alliance will be published online, alongside the manuscript. If you do want to opt out of having the reviewer reports and your point-by-point responses displayed, please let us know immediately.\*\***

Thank you for your attention to these final processing requirements. Please revise and format the

manuscript and upload materials within 7 days.

Thank you for this interesting contribution, we look forward to publishing your paper in Life Science Alliance.

Sincerely,

Shachi Bhatt, Ph.D.

Executive Editor

Life Science Alliance

<https://www.lsajournal.org/>

Tweet @SciBhatt @LSAJournal

---

November 24, 2020

RE: Life Science Alliance Manuscript #LSA-2020-00967-TR

Dr. Nina Reda Salama  
Fred Hutchinson Cancer Research Center  
Human Biology  
1100 Fairview Ave N  
Mail Stop C3-168  
Seattle, WA 98109

Dear Dr. Salama,

Thank you for submitting your Research Article entitled "Sustained *Helicobacter pylori* infection accelerates gastric dysplasia in a mouse model". It is a pleasure to let you know that your manuscript is now accepted for publication in Life Science Alliance. Congratulations on this interesting work.

The final published version of your manuscript will be deposited by us to PubMed Central upon online publication.

Your manuscript will now progress through copyediting and proofing. It is journal policy that authors provide original data upon request.

Reviews, decision letters, and point-by-point responses associated with peer-review at Life Science Alliance will be published online, alongside the manuscript. If you do want to opt out of having the reviewer reports and your point-by-point responses displayed, please let us know immediately.

**\*\*\*IMPORTANT:** If you will be unreachable at any time, please provide us with the email address of an alternate author. Failure to respond to routine queries may lead to unavoidable delays in publication.\*\*\*

Scheduling details will be available from our production department. You will receive proofs shortly before the publication date. Only essential corrections can be made at the proof stage so if there are any minor final changes you wish to make to the manuscript, please let the journal office know now.

**DISTRIBUTION OF MATERIALS:**

Authors are required to distribute freely any materials used in experiments published in Life Science Alliance. Authors are encouraged to deposit materials used in their studies to the appropriate repositories for distribution to researchers.

You can contact the journal office with any questions, [contact@life-science-alliance.org](mailto:contact@life-science-alliance.org)

Again, congratulations on a very nice paper. I hope you found the review process to be constructive and are pleased with how the manuscript was handled editorially. We look forward to future exciting submissions from your lab.

Sincerely,

Shachi Bhatt, Ph.D.

Executive Editor

Life Science Alliance

<https://www.lsjournal.org/>

Tweet @SciBhatt @LSAJournal
