# Supplementary material for: Sustained Helicobacter pylori infection accelerates gastric dysplasia in a mouse model
Source: Life Sci Alliance. 2020 Dec 11;4(2):e202000967. doi: 10.26508/lsa.202000967 (PMC7768197; doi:10.26508/lsa.202000967)
Supplement: Supplementary file 1 [file LSA-2020-00967_TableS1.xlsx]

## Sheet: NanoString Mouse Immunology 
Gene	Hp-/KRAS-1	Hp-/KRAS-2	Hp-/KRAS-3	Hp-/KRAS-4	Hp-/KRAS-5	Hp-/KRAS-6	Hp-/KRAS+1	Hp-/KRAS+2	Hp-/KRAS+3	Hp-/KRAS+4	Hp-/KRAS+5	Hp-/KRAS+6	Hp+/KRAS-1	Hp+/KRAS-2	Hp+/KRAS-3	Hp+/KRAS-4	Hp+/KRAS-5	Hp+/KRAS-6	Hp+/KRAS+1	Hp+/KRAS+2	Hp+/KRAS+3	Hp+/KRAS+4	Hp+/KRAS+5	Hp+/KRAS+6	Hp+/KRAS+7
Abcb10	521.01	503.92	446.91	460.87	602.23	540.13	511.51	545.4	457.97	467.78	446.86	438.84	413.44	312.47	352.86	423.52	369.57	478.89	335.98	295.54	321.18	319.65	273.32	267.2	255.07
Abcb1a	114.14	117.86	113.46	148.23	152.87	102.76	185.59	182.23	136.12	165.62	119.38	148.23	113.04	184.54	94.81	114.29	110.56	82.94	146.49	131.19	93.95	173.99	164.09	136.81	162.1
Abcf1	517.33	582.09	606.02	543.08	495.68	609.06	571.87	528.84	606.85	562.91	554.14	468.72	555.79	604.79	518.57	548.77	546.59	549	502.11	606.43	463.26	549.78	553.61	445.76	482.13
Abl1	575.32	523.16	564.51	492.01	498	512.56	485.1	513.54	362.98	392.85	488.8	559.53	334.94	372.18	402.32	421.95	390.06	496.67	417.72	333.66	373.48	370.73	361.59	317.3	408.23
Adal	104.94	113.05	123.14	115.84	122.76	140.36	107.13	136.35	95.71	106.96	115.34	96.09	119.32	100.8	126.14	99.42	104.35	136.26	89.17	71.78	86.08	78.4	70.82	80.29	76.88
Ahr	382.01	475.05	451.06	422.26	494.52	511.31	585.44	471.49	457.26	403.7	469.44	461.1	335.98	404.74	300.09	346.8	349.07	463.09	369.95	427.22	362.37	417.77	377.55	342.99	453.52
Aicda	20	20	20	20	20	20	20	20	20	20	20	20	20	20	20	20	20	20	20	20	20	20	20	20	20
Aire	20	20	20	20	20	20	20	20	20	20	20	20	20	20	20	20	20	20	20	20	20	20	20	20	20
Alas1	1182.85	1051.13	1073.68	981.53	1063.16	963.72	1248.6	1021.99	1154.15	1270.24	1092.95	1032.35	1137.74	900.98	1430.39	1341.01	1158.39	1250.06	1070.57	1197.01	1015.38	1425.28	1101.74	1107.97	1259.25
App	8336.13	9350.76	10984.5	8012.91	8698.71	11058.3	11574.6	9519.04	8375.39	8686.63	10147.9	8957.76	6689.33	6805.42	5661.37	6932.85	6550.35	8387.03	5688.28	5235.58	4871.89	5113.4	5182.52	4408.1	5090.05
Arhgdib	613.98	632.6	680.74	678.85	777.1	803.31	983.79	987.58	1357.62	697.47	1243.78	1149.53	865.6	1528.25	1027.24	824.33	937.27	865.96	1978.19	1798.49	1382.84	2250.71	2041.39	1677.68	2070.35
Atg16l1	299.17	325.92	354.2	340.05	378.71	340.87	350.81	364.45	319.73	344.05	294.41	335.72	284.7	305.5	290.2	282.61	309.94	372.25	305.19	234.65	273.51	290.32	316.21	316.01	308.11
Atm	119.67	113.05	106.54	146.98	178.35	146.63	104.87	80.28	79.4	103.02	95.18	98.43	74.31	95.37	97.28	98.64	88.2	141.2	74.31	61.88	63.4	78.9	67.83	71.94	103.1
B2m	6629.5	7490.23	9581.52	7093.66	8712.6	8647.16	14541.1	10287.4	17746.1	10356.1	12999.2	17583.9	43547.1	76028.1	55488.3	40158.2	45281.7	45285.4	49859.7	91398.3	30924.7	94366.8	86738.7	59230.9	80192.3
Batf	45.1	54.12	48.43	75.98	63.7	57.65	36.97	38.23	57.42	46.33	56.46	58.59	87.92	131.04	108	82.2	76.4	72.08	101.38	112.87	53.22	128.47	149.63	145.16	126.34
Batf3	20	20	20	20	20	20	20	20	26.23	20	28.23	22.85	24.07	70.56	31.33	36.79	20	24.69	71.65	83.66	46.28	91.55	96.76	87.35	61.38
Bax	272.47	339.15	383.26	430.98	353.23	402.28	429.28	411.6	404.8	362.78	375.07	458.17	375.76	358.22	394.08	351.5	331.68	275.49	565.27	504.45	455.86	480.49	450.37	563.3	628.14
Bcap31	3766.72	4235.8	4698.75	4876.5	4494.7	4698.29	4639.8	4488.09	4170.68	4170.55	4436.32	4820.75	4270.45	3572.9	3976.23	3856.28	4064	3696.85	3477.62	3375.2	2848.53	3178.3	3222.43	3509.52	3640.69
Bcl2	178.58	164.77	152.2	132.03	199.2	130.33	113.17	115.96	119.1	101.54	125.02	113.08	114.09	217.1	153.34	165.18	140.99	234.02	152.33	154.45	137.91	166.4	130.67	113.04	128.73
Bcl3	159.25	171.98	110.69	194.31	193.41	149.13	202.94	173.31	170.14	217.87	241.17	126.55	477.29	466	514.45	327.23	230.44	236.98	377.91	330.19	470.67	308.52	418.45	474.66	352.21
Bcl6	118.75	149.13	163.27	95.91	68.33	147.88	76.95	52.25	68.77	78.37	107.28	148.23	75.36	82.19	74.2	68.11	101.24	65.17	114.12	114.35	124.49	104.19	173.07	109.83	102.5
Bid	59.83	101.02	99.62	108.37	126.24	112.79	114.67	98.12	97.83	80.84	122.6	118.94	182.12	218.65	182.2	140.13	193.17	161.93	148.62	164.35	134.21	228.61	215.46	175.99	250.3
Blnk	163.85	299.46	309.93	214.24	250.16	268.19	313.09	187.32	196.38	170.55	292.8	286.5	285.74	376.83	375.94	271.65	323.6	295.23	325.36	318.31	388.75	367.19	390.52	301.88	350.42
Bst1	20	37.28	30.44	20	23.16	20	20	20	33.32	20	37.91	31.05	29.31	56.6	25.56	36.79	24.84	38.51	81.74	65.84	43.97	72.83	87.28	57.81	93.56
Bst2	405.94	760.09	459.36	458.38	478.31	573.97	966.44	615.49	2126.1	843.38	1285.73	1518.06	2327.81	4987.18	2671.16	1802.1	1671.44	2395.45	5110.27	8205.83	1673.94	8737.29	7123.65	6313.16	8127.04
Btk	23.93	30.07	47.04	38.61	38.22	35.09	43	35.68	53.17	40.91	46.78	41.6	55.47	89.94	66.78	61.06	35.4	44.43	101.38	100	61.09	125.94	161.6	112.4	100.72
Btla	20	20	20	20	32.43	20	37.72	20	85.07	33.03	45.17	43.36	25.12	74.44	49.47	38.36	29.19	29.62	180.46	270.79	129.58	314.59	319.7	181.77	234.81
Btnl1	20	20	20	20	20	20	20	20	20	20	20	20	20	20	20	20	20	20	20	20	20	35.4	20	20	20.26
Btnl2	20	20	20	20	20	20	20	20	20	20	20	20	32.45	42.65	43.69	24.27	27.33	20	25.48	55.44	20	93.06	49.88	35.33	62.58
C1qa	637.91	768.51	790.04	668.88	658.98	724.36	1095.45	1060.22	1492.31	1322.98	1020.35	1156.56	1204.73	2101.25	1487.27	1044.31	1163.98	1256.97	3077.42	3869.75	1946.53	4821.57	5138.63	3036.15	3225.91
C1qb	734.57	906.81	1070.92	1008.93	791	1036.41	1421.36	1446.33	1647.57	1560.57	1438.17	1790.5	1676.78	2560.27	1878.05	1305	1470.2	1212.53	3928.24	4394.99	2358.42	5184.21	5850.34	4129.98	4508.4
C1qbp	1560.26	1873.76	1768.26	2001.67	1786.99	2051.51	1589.6	1778.93	1495.15	1660.14	1528.51	2000.83	2233.61	2304.4	2075.09	2067.49	2323	1888.91	1566.31	1761.86	1925.71	1756.56	1885.28	1671.9	1731.85
C1ra	628.71	831.05	802.5	612.83	643.92	679.24	766.51	746.74	811.73	850.28	843.71	875.33	1040.4	1456.14	1122.05	1077.97	983.24	833.37	1408.14	1538.59	1020.47	1966.46	2231.91	1133.02	1489.29
C1s	1535.41	2021.69	2238.69	2096.34	1606.32	1605.36	2063.39	1798.04	1801.41	2028.34	1910.84	2188.91	2182.33	2852.59	2344.68	2067.49	2107.47	1359.66	2894.83	2528.19	2002.99	3139.86	3267.31	2607.73	2634.72
C2	34.06	24.05	74.72	28.65	38.22	36.34	56.58	57.34	67.35	38.94	62.11	51.56	94.2	151.2	99.76	84.55	94.41	64.18	139.06	127.23	68.49	188.15	192.52	117.54	146.6
C3	1798.67	1778.75	2875.15	1047.54	1400.18	1136.66	1382.13	1753.44	1647.57	1035.12	1735	1479.39	2935.93	7944.44	3881.42	3008.46	2553.43	2232.53	3871.45	2696	2319.55	4265.21	5012.44	3767.08	3272.39
C4a	619.5	733.63	741.62	611.59	524.63	399.77	873.64	1168.54	1036.47	1186.44	1027.61	1079.81	1640.15	2195.07	2142.7	1625.96	1583.24	858.06	1888.49	1868.29	1203.74	2218.34	2353.1	2056	1598.35
C4bp	176.74	230.91	240.75	174.38	189.93	388.5	202.94	100.67	53.88	95.63	132.28	194.52	278.42	249.67	251.45	255.99	300.62	283.39	47.24	25.74	121.25	42.99	64.34	43.68	56.62
C6	20	20	20	20	20	20	20	20	20	20	20	20	28.26	66.68	42.05	23.49	26.71	27.65	59.98	72.77	49.06	129.98	91.77	75.15	125.15
C7	93.89	629	121.76	220.47	55.59	439.88	67.15	82.83	44.66	111.4	380.72	227.33	61.75	141.89	58.53	38.36	62.11	262.65	84.92	32.18	20	108.24	141.65	25.69	44.1
C8a	20	20	20	20	20	20	20	20	20	20	20	20	20	20	20	20	20	20	20	20	20	20	20	20	20
C8b	20	20	20	20	27.8	20	20	20	20	20	20	20	20	20.16	20	20	20	23.7	20	20	20	20	20	20	20
C8g	20	20	20	20	20	26.32	20	20	20	20	20	20.51	20	21.71	20	20.35	24.84	20.74	20	20	20	20	20	20	20
C9	20	20	20	20	20	20	20	20	20	20	20	20	20	20	20	20	20	20	20	20	20	20	20	20	20
Camp	20	20	20	20	20	20	20	20	20	20	20	20	20	20	20	20	20	20	20	20	58.31	20	20	20	20
Card9	20	20	20	20	25.48	20	22.63	20	26.23	20.7	29.84	20.51	20	43.42	34.63	34.45	22.98	29.62	38.75	65.35	38.88	74.35	62.34	46.89	63.17
Casp1	35.9	97.42	94.09	90.93	60.22	75.19	107.88	48.42	72.31	63.09	75.82	74.99	441.7	446.61	683.45	450.92	532.92	179.71	248.4	453.46	205.95	469.36	646.38	336.56	595.96
Casp2	730.88	566.46	643.38	861.95	746.99	615.33	725.77	518.64	757.15	669.87	713.84	732.96	532.76	462.12	659.54	633.32	604.97	501.6	734.59	513.36	504.45	629.69	449.87	677.63	604.89
Casp3	585.44	754.07	702.88	783.48	975.14	812.08	935.5	967.2	1391.64	1291.93	823.54	961.46	1063.43	782.35	888.74	868.96	767.71	1239.19	1273.85	1490.08	1074.16	1597.24	1055.85	1136.87	1637.68
Casp8	602.93	449.8	565.9	634.01	672.87	555.17	657.87	560.69	773.45	695.5	667.06	642.14	686.62	690.08	806.29	774.23	740.38	649.71	697.97	747.02	700.22	891.68	763.09	700.11	861.75
Ccbp2	20	25.26	20	20	20	27.57	20	20	20	20	20	20	20	21.71	20.61	20	23.6	20	20	20	20	20	20	20	20
Ccl11	954.57	1540.62	1116.58	1305.38	931.14	1189.3	667.68	1172.36	884.04	1309.18	1163.12	1209.88	858.28	1715.89	728.8	895.57	734.17	770.18	1092.33	1156.42	873.76	1035.83	1272.81	1183.76	1047.69
Ccl12	20	62.54	20	39.86	31.27	80.21	41.49	48.42	62.39	51.26	55.66	29.29	82.69	62.03	69.25	26.62	42.24	75.04	229.82	180.69	186.97	152.24	184.04	251.14	260.43
Ccl19	23.01	28.86	20	20	26.64	28.82	20	20	20.56	21.69	33.88	33.4	34.54	69.78	45.34	54.8	37.89	50.36	69	58.91	38.88	80.42	112.72	46.25	64.36
Ccl2	35.9	68.55	27.67	33.63	74.12	60.15	49.79	42.05	98.54	77.88	66.95	32.81	198.87	243.47	141.8	126.82	90.68	153.05	265.92	308.91	485.48	273.63	245.39	294.82	254.47
Ccl20	20	20	20	20	20	20	27.16	48.42	97.12	51.26	29.04	53.32	123.51	69.01	102.23	79.85	117.39	30.61	299.36	471.78	539.16	307.51	293.27	289.68	562.58
Ccl22	43.26	49.31	67.8	113.35	50.96	81.46	83.74	101.94	148.17	137.03	165.35	237.87	88.97	181.44	112.12	169.09	88.2	98.74	406.04	450.98	404.95	686.34	634.41	527.33	497.62
Ccl24	25.77	34.88	20	29.89	26.64	20	26.41	31.86	20	32.04	34.68	20	20	125.61	20	20	20	20	20.7	20	20	20	20	25.69	20
Ccl25	53.39	60.13	55.34	48.58	56.75	60.15	32.44	43.33	43.95	47.32	43.56	42.77	45.01	41.09	32.15	44.62	41.62	40.48	31.85	26.73	24.07	22.76	27.93	20	28.61
Ccl26	20	20	20	20	20	20	20	20	20	20	20	20	20	20	20	20	20	20	20	20	20	20	20	20	20
Ccl3	20	20	20	20	23.16	20	20	20	20	20	21.78	20	20	40.32	21.44	20	20	25.67	36.62	20	62.94	49.06	42.39	41.75	51.25
Ccl4	20	20	20	20	20	20	20	20	20	20	20	20	20	31.79	23.91	20	20	22.71	26.01	22.28	25.92	45.01	43.89	36.61	26.22
Ccl5	38.66	36.08	59.5	54.81	107.71	129.08	118.45	77.73	190.7	109.92	171	272.44	639.52	1420.48	696.64	575.39	793.79	493.7	1205.91	1276.72	720.58	3514.64	1841.39	1774.03	1582.86
Ccl6	100.34	125.08	178.49	72.24	32.43	57.65	118.45	119.78	129.74	131.12	120.18	161.12	115.13	253.55	119.54	66.54	80.12	59.24	219.21	205.94	161.05	234.68	261.84	236.37	109.06
Ccl7	25.77	54.12	20	46.09	42.85	43.86	21.88	30.58	35.45	47.32	45.17	20	45.01	52.73	36.27	23.49	20	36.53	99.79	39.6	99.04	42.49	65.84	77.08	60.19
Ccl8	75.48	122.67	131.44	143.24	120.45	75.19	141.08	85.38	251.67	244.49	150.03	318.73	522.29	1191.74	784.03	446.22	509.32	368.3	1174.6	1132.16	1023.25	1601.29	1414.96	1253.13	1157.94
Ccl9	280.76	354.79	499.48	407.31	178.35	265.68	355.34	461.3	377.15	482.56	468.64	566.56	317.14	587.73	314.93	245.81	250.93	229.08	960.17	709.89	482.7	858.81	786.03	914.63	766.4
Ccr10	20	20	20	20	20	20	20	20	20	20	20	20	20	27.91	20	20	20	20	20	20	20	20	20.45	20	20
Ccr2	88.37	157.55	136.98	168.16	132.03	161.66	183.33	155.46	267.98	170.06	264.57	169.91	146.54	280.68	239.09	182.4	188.82	205.38	550.41	735.63	488.72	654.47	613.96	509.99	451.14
Ccr3	20	20	20	20	20	20	20	20	20	20	20	20	20	37.22	20	20	20	20	20	20	20	20.74	20	43.68	20
Ccr4	20	20	20	20	20	20	20	20	20	20	20	20	20	27.91	20	30.53	20	20	20	20	20.36	23.27	33.92	20	20
Ccr5	26.69	56.53	31.82	29.89	38.22	77.7	62.62	47.15	80.11	54.22	93.57	39.26	100.48	195.39	146.75	97.07	90.68	151.07	263.26	318.81	197.62	351.51	392.52	276.19	315.26
Ccr6	20	20	20	20	20	20	20	20	23.39	20	20	24.61	20	34.12	20	28.18	22.98	21.72	29.72	50	38.88	67.77	107.23	32.11	38.14
Ccr7	20	20	20	20	23.16	28.82	24.14	33.13	79.4	48.8	50.01	76.75	52.33	134.14	76.67	121.34	55.28	55.29	145.96	368.81	286.47	536.63	396.01	256.28	255.07
Ccr8	20	20	20	20	20	20	20	20	20	20	20	20	20	20	20	20	20	20	20	20	20	64.23	20.45	20	20
Ccr9	20	20	20	20	20	20	20	20	20	20	20	20	20	24.04	20	20	20	23.7	20	23.76	22.68	35.91	42.39	21.84	27.41
Ccrl1	81.93	96.21	89.93	78.47	39.38	78.95	52.06	61.17	90.74	82.32	70.98	93.16	41.87	43.42	44.52	29.75	54.66	73.07	71.65	66.83	43.97	96.1	74.31	58.45	44.7
Ccrl2	35.9	49.31	20	24.91	35.9	53.89	43	35.68	33.32	42.39	40.33	31.64	66.99	79.86	70.08	105.68	75.16	71.09	70.59	138.12	124.03	126.95	109.23	65.51	103.1
Cd109	54.31	169.58	135.59	88.44	57.91	96.5	149.38	49.7	65.93	32.04	109.7	125.97	35.59	62.8	68.43	36.79	43.48	97.75	74.31	58.42	92.56	74.85	74.31	73.86	78.07
Cd14	135.31	121.47	210.31	117.09	127.39	112.79	178.05	174.58	198.5	192.24	160.51	297.05	337.03	495.46	382.54	493.19	413.67	260.68	442.13	844.54	643.75	575.57	737.65	500.35	713.95
Cd160	20	20	20	20	20	20	20	20	20	20	20	20	20	23.26	20	20	20	20	20	20	20	23.77	20	20	24.43
Cd163	165.69	167.17	255.97	112.1	68.33	150.39	119.96	114.69	103.5	153.3	111.31	90.81	88.97	74.44	92.34	65.76	75.78	49.37	66.88	38.61	43.5	78.9	56.36	44.96	28.61
Cd164	4330.99	4215.36	5109.68	5655	5520.8	5032.9	4585.48	5216.99	4761.22	4905.48	4361.31	5558.98	4471.41	3894.68	4329.09	4917.03	4555.93	4095.76	3802.98	4028.66	3927.78	4082.12	3704.72	3687.44	4061.43
Cd19	20	20	20	20	35.9	20	20	20	20	20	20.17	20	20	20	28.03	20	20	20	20	20	20	42.99	55.86	20	20
Cd1d1	61.67	51.71	81.63	47.33	34.74	38.85	44.51	29.31	51.04	35.49	45.98	46.87	52.33	89.17	59.36	61.84	53.42	44.43	135.88	60.4	68.03	99.13	95.76	67.44	60.79
Cd2	20	20	20	20	50.96	20	27.16	52.25	46.08	30.56	49.2	55.66	79.55	160.5	115.42	110.38	96.27	109.6	209.12	265.84	123.1	412.71	312.22	206.82	261.62
Cd209g	21.17	40.89	20	20	31.27	30.08	20	20	20	29.08	30.65	20	26.17	20	30.5	21.92	20	21.72	22.29	20	20	20	21.45	23.77	20
Cd22	20	20	20	20	28.95	20	20.37	20	24.81	20	20	20	20	36.44	21.44	22.7	20	32.58	45.65	43.56	35.17	71.31	64.84	43.68	37.55
Cd226	20	20	20	20	20	20	24.14	20	20	20	20.97	22.26	82.69	116.31	89.04	61.84	80.75	70.11	133.75	142.08	60.16	239.74	153.12	120.75	125.15
Cd244	39.58	30.07	34.59	33.63	33.59	20	30.93	25.49	51.75	28.59	37.1	42.18	51.29	93.82	48.64	30.53	53.42	60.23	95.54	119.8	72.2	152.74	125.19	95.7	132.3
Cd247	20	20	20	20	32.43	20	20	39.5	23.39	20	20.17	20	27.21	86.84	48.64	50.1	42.86	50.36	92.89	114.85	53.22	180.56	161.6	95.7	109.66
Cd24a	8327.84	9966.53	10137.7	10261.2	10097.7	14583.6	9905.79	9629.9	6430.06	6697.23	8834.73	12093.5	8203.87	8694.22	6128.82	8835.16	8311.86	11022.4	5684.04	4885.58	5422.62	4098.81	4422.92	4869.91	6297.46
Cd27	20	20	20	20	20	20	20	20	20	20	20	20	20.93	44.97	24.73	25.05	20	22.71	45.12	36.63	24.99	76.37	60.35	53.95	43.5
Cd274	34.06	38.49	27.67	39.86	46.33	43.86	38.48	49.7	43.25	25.63	58.88	31.05	187.36	182.21	141.8	223.89	114.91	207.36	195.85	227.22	132.82	241.26	206.98	172.14	271.16
Cd28	20	20	20	20	20	20	20	20	20	20	20	20	20	20	20	20	20	20	20	20	20	20	23.44	20	20
Cd34	1106.45	1219.51	1562.1	1069.97	1046.95	1015.1	1032.83	844.86	689.8	915.34	1014.71	1142.5	793.38	968.44	641.41	650.54	901.25	676.37	735.65	557.91	491.96	637.28	577.05	644.87	463.06
Cd36	2034.32	2601.38	3497.77	1918.22	2018.62	3955.14	2370.45	1566.12	845.05	896.12	1866.48	2141.45	1477.91	741.25	802.17	1513.23	1541	2462.59	683.63	498.51	341.08	613	536.66	398.23	605.49
Cd3d	20	20	20	20	37.06	37.6	39.23	63.72	53.88	35.49	64.53	46.29	144.44	310.15	161.59	153.44	149.69	144.16	311.03	383.66	127.73	572.54	481.29	326.93	304.53
Cd3e	20	20	20	20	37.06	20	41.49	33.13	46.08	30.07	23.39	35.15	132.93	241.92	125.31	120.56	111.8	88.87	235.66	328.71	105.06	538.65	399	293.53	256.86
Cd3eap	127.95	121.47	107.92	98.4	110.02	141.61	97.32	104.49	80.11	82.32	111.31	93.16	103.62	123.28	144.28	119.77	108.7	186.62	102.97	100.49	106.91	94.58	112.22	114.97	94.76
Cd4	51.55	38.49	49.81	46.09	54.43	60.15	60.36	26.76	41.12	38.94	54.85	55.66	99.43	249.67	168.18	160.48	145.34	152.06	161.89	203.96	88.39	276.15	276.81	184.98	212.16
Cd40	27.62	26.46	20	32.39	35.9	26.32	27.16	20	21.27	26.12	30.65	35.15	29.31	75.99	33.8	55.58	22.36	41.47	81.74	90.1	57.39	117.34	113.22	101.48	113.83
Cd40lg	20	20	20	20	20	20	20	20	20	20	20	20	20	31.01	20	20	20	20.74	35.56	32.18	30.54	34.9	27.43	25.69	27.41
Cd44	1224.28	1355.41	910.42	1606.82	1180.13	594.02	964.17	1373.7	1365.41	1621.2	1002.61	1262.61	1045.63	1584.08	1355.36	1232.19	1137.9	850.16	1904.41	2005.42	2260.31	1984.67	2329.16	2187.67	2109.09
Cd46	20	20	20	20	20	20	20	20	20	20	20	20	20	20	20	20	20	20	20	20	20	20	20	20	20
Cd48	104.02	101.02	81.63	93.42	129.71	104.02	137.31	124.88	161.64	118.79	159.71	138.27	186.31	378.38	248.15	202.76	187.58	254.75	512.73	503.46	268.42	658.02	612.96	430.98	505.37
Cd5	20	20	20	20	20	20	23.39	20	23.39	20	20.17	31.64	54.43	113.98	65.13	59.5	71.43	55.29	124.73	176.24	76.36	254.91	166.58	109.83	154.35
Cd53	20	28.86	29.06	26.16	28.95	28.82	30.18	26.76	27.65	20	29.04	29.88	28.26	45.75	23.08	28.18	21.74	27.65	53.61	58.91	47.21	63.73	87.28	59.73	67.34
Cd55	618.58	660.27	845.39	883.13	890.6	873.49	764.25	679.2	864.19	868.02	792.89	947.98	735.82	503.21	651.3	677.16	872.06	622.07	699.03	684.15	657.64	772.83	510.22	843.98	892.74
Cd59b	80.08	46.9	58.11	98.4	106.55	155.4	89.78	70.09	83.65	59.15	67.75	84.95	42.91	23.26	30.5	57.15	31.68	39.5	23.88	20	29.62	20	20	20	20
Cd6	20	20	20	20	20	20	20	20	20	20	20	20	47.1	86.07	46.17	41.49	55.9	23.7	82.8	120.3	41.65	163.87	117.71	78.36	93.56
Cd69	20	20	20	20	20	20	20	20	20	20	20	20	20	22.49	20	22.7	20	20	20	25.25	20	37.43	31.42	20	28.01
Cd7	20	20	20	20	20	20	20	20	20	20	22.58	20	51.29	158.18	76.67	73.59	82.61	58.26	84.92	61.88	24.07	171.96	85.29	98.27	69.13
Cd74	4029.99	4721.68	6058.84	4241.25	5532.38	5505.36	9305.26	5843.95	9794.68	7620.46	10608.5	10653.4	24905.7	63073.2	43595.9	31677.7	32730.7	25829.6	35351	59939.8	18537.9	79019.5	90439.9	41818.2	58802.9
Cd79a	20	20	20	20	20	20	20	20	20	20	20	20	20	20	20	20	20	20	20	20	20	20	20	20	20
Cd79b	20	20	20	20	77.59	20	21.88	20	52.46	24.65	33.07	22.26	105.71	127.94	113.77	57.93	85.71	50.36	42.46	60.89	48.59	106.72	149.13	57.16	73.9
Cd80	20	37.28	27.67	20	20	20	36.97	29.31	37.57	23.66	33.07	41.6	32.45	75.21	51.11	37.58	34.78	50.36	80.15	103.46	158.74	128.97	150.12	96.99	127.53
Cd81	5812.09	6659.19	6801.84	5702.33	6244.63	6470.33	5919.33	5443.82	4194.07	5091.8	5650.26	5552.54	5265.84	5963.37	4789.95	5179.29	5341.03	5735.84	5212.18	5081.12	6702.72	5678.86	5957.08	5270.06	6200.32
Cd82	2682.36	2952.56	3719.15	4173.99	3966.59	3382.42	3972.12	4247.25	4054.41	4024.65	3212.7	3882.15	3933.42	3059.61	3668.72	3523.57	3948.47	2958.27	3836.95	4176.68	3289.58	4315.29	3893.74	3918.67	4604.35
Cd83	63.52	90.2	56.73	94.67	145.92	97.75	144.1	144	160.22	122.74	165.35	141.2	147.58	310.15	200.34	280.26	186.96	168.85	454.87	635.14	498.43	625.14	598	478.51	519.67
Cd86	35.9	27.66	52.58	32.39	28.95	37.6	64.13	44.6	80.11	91.19	54.04	78.51	56.52	132.59	69.25	75.15	70.19	83.93	234.6	350.99	148.1	382.87	434.41	217.1	315.26
Cd8a	20	20	20	20	20	20	20	20	20	20	20	20	53.38	94.6	61.01	38.36	78.26	51.35	82.27	58.42	31.93	216.98	79.8	64.23	75.69
Cd8b1	20	20	20	20	20	20	20	20	20	20	20	20	20	20	20.61	20	32.92	20	23.35	20	20	57.66	20	27.62	22.65
Cd9	3140.78	5235.22	4601.9	5256.41	3927.21	3535.31	5782.02	6618.73	5844.48	6950.09	5275.19	6294.28	4037.04	3996.26	3545.05	2890.25	3947.23	2798.31	5660.15	5600.92	5484.63	5658.12	5764.06	5611.77	7097.83
Cd96	20	20	20	20	20	20	20	20	20	20	20	20	20	20.16	20	20	20	20	20	20	20	23.77	20	20	20
Cd97	485.11	479.87	406.78	425.99	528.11	387.24	422.49	454.93	397.71	507.7	460.57	318.14	452.17	569.9	525.99	453.27	389.44	423.6	628.43	643.06	398.93	700.5	735.16	574.22	586.42
Cd99	1452.56	1099.24	628.16	626.53	787.53	941.16	1055.46	1001.6	971.24	894.64	1101.82	750.53	644.75	1014.96	803.82	1002.04	701.87	1061.46	997.85	589.6	748.81	1136.48	1026.93	806.09	690.71
Cdh5	186.86	218.89	275.34	176.87	202.67	250.64	227.09	155.46	175.82	183.86	204.88	220.3	127.69	197.72	138.5	154.22	142.24	195.51	120.49	125.25	120.79	132.01	133.67	98.27	120.98
Cdkn1a	5577.36	3790.82	6871.02	6556.81	5058.71	5247.2	6537.97	5380.1	6850.46	5370.79	5159.84	7031.34	5475.18	2508.32	5464.33	5698.31	6081.41	2961.23	5363.98	4115.79	6453.27	3475.19	2738.64	4485.82	4538.79
Ceacam1	124.27	204.45	181.25	587.92	311.54	112.79	344.78	532.66	821.66	1009.49	275.05	526.72	831.06	268.28	816.19	856.43	852.8	145.15	1607.71	1565.82	2515.78	1259.38	1475.8	1806.14	3359.4
Cebpb	626.87	660.27	736.08	424.75	518.84	561.44	691.82	477.86	643.72	457.92	699.33	643.9	840.48	1218.11	1013.23	1142.17	780.13	820.53	1005.28	1289.09	1611.47	1035.83	1202.99	987.86	877.84
Cfb	84.69	116.66	132.83	188.08	191.09	66.42	182.57	192.42	292.08	264.69	160.51	232.01	443.79	810.26	570.51	407.08	495.66	173.78	610.92	781.67	342.47	925.07	1169.57	578.71	1064.97
Cfd	1377.08	811.8	1491.53	435.96	69.49	90.23	28.67	20	1873.01	283.92	491.22	36.33	579.86	124.83	20.61	20	41.62	20	1823.2	197.52	93.02	58.67	374.06	48.81	51.85
Cfh	618.58	903.21	787.28	637.74	623.07	748.17	1046.41	1216.96	915.95	912.88	984.86	1011.84	634.29	1149.1	743.64	662.28	632.3	584.54	1134.26	886.62	845.53	1170.37	1396	830.49	1112.05
Cfi	1204.03	1175.01	1753.04	1302.89	1583.16	1675.54	1499.07	1555.92	717.44	1025.75	1277.66	1942.83	1877.74	2879.72	1422.14	1635.36	1863.37	1529.49	751.57	949.99	840.44	881.57	1325.68	705.89	820.63
Cfp	148.2	182.81	185.4	146.98	174.88	139.11	191.63	161.84	277.9	220.33	206.49	183.97	205.15	341.16	201.16	160.48	161.49	141.2	436.29	416.83	283.7	546.24	521.69	359.69	326.58
Chuk	1234.4	1063.16	1234.18	1342.75	1379.33	1184.29	1636.38	1701.19	1968.01	1918.92	1350.25	1614.73	1028.89	871.52	1022.29	1020.83	1075.78	1112.81	1477.14	1281.17	1281.03	1216.39	1049.37	1251.2	1290.24
Ciita	24.85	40.89	20	37.37	48.64	33.84	49.79	44.6	107.76	55.7	86.31	46.87	191.54	471.42	362.75	278.69	224.85	268.57	376.85	466.83	201.78	696.45	732.66	398.23	434.45
Cish	88.37	85.39	110.69	61.03	97.28	112.79	122.22	112.14	80.82	69.99	86.31	77.34	91.06	152.75	93.99	118.21	90.68	174.77	88.11	90.1	83.77	96.1	86.28	82.86	88.2
Clec4a4	20	20	20	20	20	20	20	20	20	20	20	20	20	20	20	20	20	20	20	20	20	20	20	20	20
Clec4e	20	20	20	20	20	20	20	20	20	20	20	20	20	34.12	20	28.18	20	20	20	23.27	20	20	20	20	20
Clec5a	20	26.46	20	20	20	31.33	28.67	28.03	35.45	34.01	20.97	28.12	35.59	51.95	41.22	36.01	33.54	33.57	84.39	85.64	62.48	139.09	126.18	106.62	137.07
Clu	14651.7	13412.2	22252.6	16333.5	18144.4	16838.2	38511.9	33017.2	41959.2	44430.8	36142.3	36162.7	20854	30418.5	15966.8	17441	19965.3	17074.2	54569.7	66528.9	58279.4	62189.3	73426	41519.5	73471.7
Cmklr1	158.33	119.06	145.28	89.68	84.54	112.79	132.03	131.25	146.04	136.54	126.64	140.03	126.65	154.3	126.96	97.07	106.83	96.77	218.68	223.26	113.39	271.6	278.3	182.41	181.77
Cr2	20	20	20	20	20	20	20	20	20	20	20	20	20	20	20	20	20	20	20	20	20	20	20	20	20
Cradd	165.69	181.6	149.43	156.94	171.4	224.32	202.94	220.45	159.51	145.41	149.22	197.45	132.93	151.97	113.77	111.95	147.21	135.27	149.15	133.66	139.3	157.3	126.18	124.61	118
Crlf2	130.71	126.28	154.96	117.09	108.86	140.36	184.08	201.34	226.15	155.76	136.32	178.7	178.98	319.45	182.2	151.09	185.72	138.24	358.27	449.5	307.3	448.12	473.81	322.43	382.6
Csf1	177.66	248.95	233.83	206.77	235.1	297.01	258.02	207.71	209.14	222.3	223.43	174.01	200.96	224.86	207.76	183.97	175.78	296.22	236.19	272.77	200.85	328.75	299.25	221.59	236.59
Csf1r	548.62	655.46	668.28	600.38	462.09	602.79	955.87	722.53	821.66	896.61	821.12	905.21	614.4	1273.93	884.61	702.21	654.66	657.61	2021.18	1722.26	1137.56	2381.2	2234.9	1801.65	1985.72
Csf2	20	20	20	20	20	20	20	20	20	20	20	20	20	20	20	20	20	20	20	20	20	20	20	20	20
Csf2rb	50.63	34.88	52.58	32.39	35.9	37.6	70.92	48.42	64.51	59.64	77.43	76.75	72.22	217.88	112.12	116.64	76.4	85.9	205.41	313.86	195.3	345.45	384.04	192.69	207.39
Csf3r	22.09	31.27	20	20	32.43	20	20	20	33.32	24.15	20.97	20	45.01	118.63	57.71	85.33	39.13	72.08	56.79	70.79	65.25	95.09	105.74	51.38	87.01
Ctla4	20	20	20	20	20	20	20	20	31.9	20	20	36.91	31.4	107.78	53.59	93.94	49.07	59.24	104.56	330.69	342.01	370.73	294.26	107.26	205.01
Ctnnb1	7853.78	6613.48	7432.77	9151.38	8209.98	7945.36	8275.45	7910.87	8460.46	8716.2	8020.87	9499.13	5840.47	5251.58	6349.77	6378.6	6189.48	5503.8	7591.1	5591.51	6864.24	5717.8	5097.23	7028.68	7856.48
Ctsc	894.73	898.39	523.01	1215.7	905.66	934.9	842.71	872.9	1234.97	1143.56	621.08	1233.31	1301.02	1227.41	1451	1213.41	777.02	830.41	2169.8	1899.98	1422.64	1865.3	2234.4	2053.43	2732.45
Ctsg	20	20	20	20	20	20	20	20	20	20	20	20	20	20	20	20	20	20	20	20	20	20	20	20	20
Ctss	418.83	600.13	765.14	635.25	575.59	679.24	1225.96	964.65	1425.67	1065.19	1153.44	1534.46	1582.58	3753.56	2019.03	1430.25	1740.38	1586.76	3713.81	5755.87	2146	7770.24	9200.45	4545.55	6839.78
Cul9	177.66	184.01	184.02	173.14	202.67	201.77	172.77	172.03	95	96.61	120.18	142.96	86.87	115.53	102.23	117.43	106.83	202.42	95.54	81.19	85.16	79.41	71.32	66.16	88.8
Cx3cl1	242.09	221.29	294.71	331.33	415.77	288.24	608.08	512.27	753.6	594.95	452.5	407.78	435.42	320.23	388.31	376.55	352.8	349.54	519.1	558.41	492.88	562.93	603.49	393.09	571.52
Cx3cr1	154.65	254.97	120.37	234.17	317.33	348.39	473.03	317.3	395.59	399.26	462.18	187.49	278.42	390.79	377.59	292	275.16	416.69	869.4	799.99	617.84	1056.06	863.34	911.42	924.33
Cxcl1	20	20	20	20	20	20	20	20	20	20	20	20	37.68	41.09	33.8	32.88	20	23.7	24.42	42.57	144.39	29.34	55.36	30.83	57.81
Cxcl10	20	20	20	20	25.48	26.32	20	20	26.23	25.14	50.01	20	164.33	345.04	136.86	145.61	66.46	172.8	299.36	577.72	45.35	475.43	390.02	288.39	394.52
Cxcl11	20	20	20	20	20	20	20	20	20	20	20	20	25.12	45.75	20	23.49	20	20	31.85	58.91	20	111.27	46.88	34.68	78.67
Cxcl12	1851.14	2454.65	2536.16	2025.34	2291.94	2857.32	2787.65	2161.22	1668.84	1966.24	2101.2	2454.9	1703.99	1722.87	1376.8	1870.21	1842.25	2138.72	1537.65	1299.98	1064.44	1784.38	1474.81	1307.08	1172.84
Cxcl13	37.74	62.54	66.41	38.61	99.6	26.32	31.69	154.19	216.93	38.45	29.04	36.91	343.31	155.07	271.24	189.45	207.45	60.23	283.43	142.08	96.26	366.69	210.97	172.14	317.05
Cxcl15	20	20	20	20	20	20	20	20	20	20	20	20	70.13	85.29	70.08	73.59	78.26	23.7	24.95	20	56.92	20	47.88	25.05	20
Cxcl3	20	20	20	20	20	20	20	20	20	20	20	20	20	20.93	20	20	20	20	20	20	336.92	20	30.42	20	23.84
Cxcl9	20.25	27.66	30.44	29.89	63.7	72.69	58.85	36.95	68.06	40.91	61.3	77.34	471.01	1093.27	515.27	461.88	343.48	511.48	1142.22	1323.75	137.45	1295.29	1551.11	915.28	1681.79
Cxcr1	20	20	20	20	20	20	20	20	20	20	20	20	20	20	20	20	20	20	20	20	20	20	20	20	20
Cxcr2	20	20	20	20	20	20	21.88	20	20	20	20	20	20	44.2	28.03	32.1	20	29.62	20	20	23.14	20	20	20	20
Cxcr3	20	20	20	20	32.43	20	36.97	29.31	46.79	27.11	40.33	29.88	61.75	144.22	83.27	67.32	63.35	48.38	175.69	184.65	70.35	266.04	203.99	182.41	185.94
Cxcr4	76.4	62.54	112.07	100.89	134.34	81.46	141.08	135.08	153.13	147.38	94.37	165.81	151.77	321.78	175.6	242.68	204.97	143.17	212.31	518.31	306.37	551.3	488.28	210.03	328.97
Cxcr5	20	20	20	20	20	20	20	20	20	20	20	20	20	20	20	20	20	20	20	20	20	20	20	20	20
Cxcr6	29.46	52.92	47.04	42.35	48.64	70.18	79.22	50.97	91.45	48.31	85.5	31.64	197.82	360.55	194.57	156.57	178.88	209.33	348.72	368.81	189.75	545.73	383.04	365.47	352.21
Cybb	110.46	155.14	167.42	150.72	198.04	175.45	253.49	258.68	281.45	227.23	234.72	317.56	264.81	654.41	389.96	291.22	321.12	315.97	672.49	898.5	540.55	1169.86	1383.53	834.35	1293.22
Ddx58	173.06	358.4	226.91	215.49	289.53	239.36	329.69	277.8	521.07	278.5	358.13	483.95	536.95	964.56	527.64	388.29	432.92	588.49	701.68	1312.36	379.03	1318.05	984.03	1010.34	1509.55
Defb1	20	152.74	139.74	36.12	20	76.45	168.24	39.5	100.67	20	132.28	129.48	20	81.41	72.55	20	20	127.38	79.09	63.37	302.67	43.5	64.34	68.73	86.41
Defb14	20	92.61	84.4	83.45	20	52.63	181.07	20	165.18	20	80.66	70.89	20	86.84	71.73	34.45	31.06	139.22	58.38	89.6	2596.77	68.28	76.81	233.15	196.07
Dpp4	201.59	163.56	181.25	290.22	293.01	55.14	49.04	205.16	120.52	228.22	87.11	164.05	103.62	99.25	139.33	115.08	131.68	60.23	131.63	178.71	151.34	183.6	160.6	203.61	132.9
Ebi3	29.46	20	27.67	39.86	50.96	52.63	53.57	62.44	69.48	43.87	53.24	69.72	38.73	72.11	61.83	40.71	49.69	60.23	124.2	125.25	115.24	164.38	164.59	128.46	143.63
Eef1g	4910.91	5986.89	6300.97	7486.02	6092.92	6342.5	5934.42	6230.06	6017.46	6468.51	6810.16	7855.11	6373.23	7066.72	7582.29	7148.13	7279.55	5064.41	7769.44	6791.99	7228.46	6309.56	6467.8	7670.33	8367.21
Emr1	160.17	151.54	159.12	155.7	154.03	151.64	215.02	128.7	263.72	258.78	197.62	189.24	243.88	319.45	236.61	168.31	211.8	198.47	455.93	559.4	367	790.53	718.2	509.99	520.86
Entpd1	409.63	429.35	511.94	318.87	302.27	339.62	443.61	359.35	340.29	357.36	362.17	520.86	315.05	505.54	373.47	349.93	318.64	366.33	467.08	561.38	326.74	753.1	710.22	480.44	604.89
Eomes	20	20	20	20	20	20	20	20	20	20	20	20	20	20.93	20	20	20	20	20	20	20	20	20	20	20
Ets1	281.68	417.33	380.49	350.01	438.93	461.18	462.47	358.08	388.5	334.2	430.73	351.54	440.65	642.78	449.32	500.24	492.55	521.35	581.2	692.07	443.36	893.71	820.44	594.13	644.23
Fadd	139	175.59	132.83	165.66	160.98	175.45	147.87	126.16	153.13	144.92	130.67	134.17	138.16	139.57	121.19	124.47	151.55	140.21	124.73	122.77	121.25	120.37	119.7	130.39	107.87
Fas	116.9	76.97	127.29	102.14	121.6	106.52	117.69	100.67	87.2	74.43	95.18	124.21	95.25	106.23	113.77	110.38	102.49	99.73	95.01	86.63	72.2	111.27	94.26	95.06	113.23
Fasl	20	20	20	20	20	20	20	20	20	20	20	20	20	43.42	20	23.49	20	20.74	25.48	41.58	23.6	60.19	40.9	28.26	45.29
Fcamr	20	20	20	20	20	20	20	20	20	20	20	20	20	20	20	20	20	22.71	20	20	20	20	20	20	20
Fcer1a	23.93	28.86	40.12	34.88	20	26.32	63.37	48.42	31.19	32.53	46.78	34.57	30.35	124.83	28.86	26.62	29.19	20	44.58	24.75	24.53	25.79	26.93	32.11	23.24
Fcer1g	132.55	176.79	185.4	130.79	159.82	145.37	216.52	215.36	250.25	187.8	221.01	233.77	269	484.61	325.65	281.82	206.21	246.85	630.56	716.33	394.77	807.73	895.26	610.83	752.69
Fcgr1	25.77	52.92	34.59	54.81	38.22	88.98	100.34	96.85	98.54	100.55	97.6	75.58	96.29	151.97	143.45	99.42	98.14	113.55	317.93	422.77	192.99	394	437.9	337.85	466.04
Fcgr2b	521.93	579.69	733.31	621.55	406.5	448.65	773.3	782.42	821.66	785.21	712.23	1243.27	716.98	1567.8	803	610.62	750.94	603.31	1468.65	1598	1551.3	2172.31	2247.87	1799.72	2153.19
Fcgr3	84.69	99.82	153.58	118.33	72.96	92.74	179.56	132.53	171.56	170.55	151.64	203.89	170.61	281.46	172.31	144.04	159.63	101.7	408.69	365.34	273.51	520.44	502.74	406.58	527.42
Fcgr4	35.9	40.89	56.73	54.81	54.43	46.37	79.22	86.65	95	66.54	79.85	119.52	182.12	345.81	206.93	131.52	175.16	148.11	385.87	600.98	246.67	600.86	921.19	516.41	791.43
Fcgrt	373.73	494.3	575.58	414.78	348.6	396.01	425.5	358.08	353.05	382.01	401.69	420.09	289.93	386.13	271.24	312.35	296.28	302.15	455.93	360.39	318.87	474.92	446.88	318.58	384.39
Fkbp5	2205.54	523.16	2493.27	361.22	309.22	696.79	1078.85	907.3	838.67	584.1	688.84	2343	270.04	402.42	211.05	287.3	271.43	447.3	372.07	242.08	193.91	289.3	371.57	270.41	343.27
Fn1	2682.36	2746.9	3482.55	2093.84	2026.73	1891.1	2694.1	2036.34	3583.68	2712.01	2698.09	2763.67	1508.26	2163.28	1696.68	1564.9	1445.97	2071.58	2193.15	2257.89	2282.06	2503.59	2207.47	2005.9	1382.62
Folr4	20	20	20	20	20	20	20	20	20	20	20	20	20	24.81	20	20	20	20	20.7	33.66	20	48.05	42.89	23.12	38.14
Foxp3	20	20	20	20	20	20	20	20	31.19	20	29.04	20	20	41.09	20	22.7	20	24.69	65.28	128.71	43.5	176.01	154.61	80.29	79.26
Frmpd4	20	20	20	20	20	20	20	20	20	20	20	20	20	20	20	20	20	20	20	20	20	20	20	20	20
Fyn	224.6	281.42	228.3	204.28	216.57	213.05	214.26	170.76	184.32	184.84	229.88	233.77	197.82	346.59	237.44	235.64	214.29	289.31	324.3	319.3	194.38	429.4	340.65	333.35	289.63
G6pdx	2478.93	3214.74	3172.62	3904.94	3452.38	2715.71	3273.51	3515.8	3919.72	3604.68	3846.69	3851.09	3107.59	2407.52	3014.12	2489.44	2880.14	2431.98	3769.54	3605.89	3686.2	3759.94	3460.83	4035.56	4685.4
Gapdh	28661	27432.9	31106.4	28077	27504.4	27016.7	31649.5	30365.3	39034.8	37364.9	31499.5	33646.8	27060.8	21745.2	24610.1	27323.5	26636.8	28256.6	32700.3	34591.1	39950.7	29003.2	27398.9	32836.2	33461.7
Gata3	26.69	50.51	44.28	46.09	33.59	48.88	50.55	43.33	51.75	38.94	58.88	58.59	34.54	75.21	52.76	33.66	45.34	64.18	82.27	88.12	73.12	112.28	87.78	80.93	69.13
Gfi1	20	20	20	20	20	20	20	20	20	20	20	20	20	31.01	20	20	20	20	20	20	20	28.32	21.45	20	20
Gm10499	44.18	20	35.97	74.74	70.65	53.89	70.92	54.8	99.96	83.3	63.72	87.3	85.83	124.06	112.12	93.16	100.62	129.35	110.93	215.34	99.96	175.5	173.57	114.97	219.91
Gp1bb	20	49.31	40.12	20	20	36.34	60.36	25.49	26.23	20	33.88	56.25	20	32.57	20	21.14	20	34.56	33.44	22.28	26.84	26.3	24.94	33.4	29.8
Gpi1	57.07	52.92	69.18	74.74	50.96	65.17	78.46	66.26	100.67	81.33	68.56	89.06	75.36	51.17	69.25	51.67	73.91	42.46	80.68	64.36	97.19	56.14	53.37	53.31	59
Gpr183	24.85	33.67	30.44	31.14	40.53	20	51.3	28.03	57.42	48.31	41.94	39.84	41.87	74.44	46.17	36.01	45.34	39.5	74.31	109.4	90.25	115.82	132.17	74.51	81.65
Gpr44	20	20	20	20	20	20	20	20	20	20	20	20	20	20	20	20	20	20	20	20	20	20	20	20	20
Gusb	431.72	416.12	366.66	443.43	463.25	438.62	407.4	411.6	414.73	432.78	416.21	461.69	456.35	646.66	464.15	468.92	523.61	445.32	563.68	566.82	473.91	633.23	686.28	576.14	776.53
Gzma	20	20	20	20	20	20	20	20	20	20	20	20	181.08	282.23	155.82	148.74	167.08	89.85	196.92	97.52	37.49	233.16	223.44	169.57	284.87
Gzmb	20	20	20	20	20	20	20	20	20	20	20	20	36.63	71.33	29.68	22.7	31.68	20	33.44	52.97	20	101.16	54.36	45.6	78.07
H2-Aa	1748.05	2173.23	2808.73	2579.63	2529.35	2636.76	4914.42	3094.01	5093.72	3895.01	5330.04	6768.86	9483.96	22904.4	15299.8	10411.8	12627.4	8402.83	18106.8	28296.7	9775.71	35630.9	37802.8	22330.2	27909.2
H2-Ab1	1838.26	2182.85	2569.37	2151.14	2667.17	2557.8	4270.88	2705.34	4226.69	3031.42	5107.42	5580.66	8929.22	24414.1	16868.7	12600.6	12101.3	9327.04	16867.9	24203.7	7785.67	29756.3	33215.3	18186.7	28350.2
H2-DMa	126.11	190.02	215.84	194.31	223.52	235.6	309.32	220.45	310.51	237.09	323.45	366.77	1025.75	2295.87	1643.09	1160.96	1278.89	809.67	1425.12	1773.74	583.13	2306.34	2705.22	1594.19	2063.79
H2-DMb2	31.3	27.66	49.81	44.84	57.91	26.32	37.72	43.33	82.95	36.48	67.75	77.34	123.51	741.25	150.87	140.13	96.9	168.85	235.66	400.49	130.97	559.89	620.94	265.91	383.8
H2-Ea-ps	20	20	20	20	20	20	20	20	20	20	20	20	20	20	20	20	20	20	20	20	20	20	20	20	20
H2-Eb1	1728.72	1836.48	2230.38	1513.4	2097.37	1878.56	3391.21	2426.27	3178.88	2307.82	4788.81	4428.79	6581.52	16862	10847	8753.74	7449.12	6408.27	14824.5	18689.9	6299.62	23043.2	24052.2	16436.4	17408.5
H2-K1	3528.31	3699.41	3865.81	4096.76	3934.16	3698.23	5716.39	4925.18	7225.49	5277.14	6217.3	6968.65	14829.4	29110.5	22300.9	17920.8	17510.1	12656.6	19839.7	26683.3	10692.5	27724.1	25481.2	21804.1	27301.3
H2-Ob	20	20	20	20	33.59	20	20.37	20	38.28	20	44.36	28.12	20.93	48.07	26.38	20	21.12	26.66	66.35	81.19	48.59	108.74	102.24	59.73	72.71
H2-Q10	78.24	43.3	55.34	36.12	27.8	28.82	26.41	71.36	202.76	74.43	33.07	50.97	87.92	131.04	94.81	75.15	67.7	45.42	197.45	404.45	113.39	341.9	252.87	323.72	507.16
H60a	20	20	20	20	20	20	20	20	20	20	20	20	20	20	20	20	20	20	20	20	20	20	20	20	20
Hamp	20	20	20	20	20	20	20	20	20	20	20	24.61	20	94.6	20	20	20	20	20	20	20	20	20	20	20
Hc	20	20	20	20	20	20	20	20	20	20	20	20	20	20	20	20	20	20	20	20	20	20	20	20	20
Hcst	22.09	20	20	20	20	20	20.37	20	21.98	20	20	20	40.82	79.09	50.29	43.84	31.06	41.47	66.88	81.68	40.26	109.25	76.81	52.03	41.72
Hfe	207.11	238.13	318.23	185.59	287.22	269.44	344.02	225.55	320.44	283.92	264.57	379.66	197.82	280.68	192.92	253.64	283.85	242.9	389.06	608.41	435.49	491.11	535.16	581.28	457.1
Hif1a	253.14	309.09	338.99	320.12	291.85	329.59	467	351.71	825.91	717.68	449.28	393.72	411.34	704.81	450.14	495.54	468.95	559.86	540.33	920.29	1002.89	828.97	884.78	515.12	671.05
Hlx	88.37	108.24	60.88	68.51	118.13	97.75	72.43	73.91	58.13	67.53	92.76	47.46	68.03	93.82	65.95	53.23	63.35	156.01	92.89	83.17	116.16	95.59	87.78	79.65	68.53
Hprt	917.75	656.66	709.79	587.92	641.6	651.67	767.26	776.05	748.64	657.55	667.87	630.42	588.23	635.03	610.08	644.28	589.44	655.64	587.56	623.75	731.22	622.61	555.61	606.33	467.82
Icam1	34.98	55.32	52.58	38.61	71.8	57.65	64.13	58.62	92.16	82.81	84.69	63.28	110.95	188.41	103.05	95.51	69.57	77.02	185.77	245.54	161.52	285.76	289.28	190.12	186.53
Icam2	69.96	85.39	106.54	82.21	97.28	130.33	99.59	84.1	75.15	75.42	86.31	90.81	102.57	94.6	92.34	87.68	95.03	109.6	68.47	83.66	64.33	81.94	82.29	73.22	71.51
Icam4	20	20	20	20	20	20	20	20	20	20	20	20	20	20	20	20	20	20	20	20	20	20	20	20	20
Icam5	20	20	20	20	20	20	20	20	20	20	20	20	20	20	20	20	20	20	20	20	20	20	20	20	20
Icos	20	20	20	20	20	20	30.93	20	20.56	20	20	20	38.73	98.47	63.48	65.76	53.42	67.14	88.11	124.75	114.31	166.4	151.62	105.98	123.96
Icosl	288.12	234.52	272.57	432.22	365.97	348.39	362.13	271.43	423.94	353.42	317	403.68	196.78	178.34	264.64	281.82	246.59	359.42	295.64	307.92	359.13	403.1	336.16	279.4	335.52
Ifi204	53.39	38.49	62.26	46.09	34.74	41.36	62.62	39.5	43.95	43.38	50.01	56.83	39.77	68.23	65.95	43.06	30.43	35.55	131.1	135.64	131.9	152.74	165.09	120.75	173.42
Ifi35	399.5	578.48	578.35	515.68	545.48	581.49	977	876.72	1446.23	780.78	898.56	1093.87	1162.86	1346.04	1039.61	858	890.07	1050.6	1301.45	2414.33	752.97	2279.53	1815.95	1698.24	2213.97
Ifih1	242.09	357.19	334.83	383.64	383.34	367.19	864.59	628.23	1288.85	631.42	750.14	1059.3	822.69	866.86	807.94	632.54	663.36	827.45	1070.57	1714.33	644.68	1701.94	1203.98	1231.29	2039.95
Ifit2	73.64	73.36	58.11	68.51	67.17	58.9	60.36	59.89	63.1	62.11	83.89	83.2	94.2	89.17	65.13	54.02	61.49	78.01	122.61	251.48	41.65	243.28	185.04	119.47	217.52
Ifitm1	367.28	524.36	675.2	398.59	325.43	431.1	506.23	951.9	723.83	426.86	545.26	563.05	923.17	1372.4	816.19	715.52	709.94	448.28	874.18	953.45	1447.17	832	1369.57	1186.97	1092.39
Ifna1	20	20	20	20	20	20	20	20	20	20	20	20	20	20	20	20	20	20	20	20	20	20	20	20	20
Ifna2	20	20	20	20	20	20	20	20	20	20	20	20	20	20	20	20	20	20	20	20	20	20	20	20	20
Ifnar1	828.46	799.78	796.96	823.34	923.03	862.21	881.19	779.87	774.16	739.86	854.19	764.59	639.52	828.87	721.38	723.35	742.24	907.43	907.62	911.37	771.02	1021.67	925.68	921.06	1035.77
Ifnar2	207.11	293.45	268.42	274.03	228.15	275.71	267.83	257.41	263.02	278	272.63	302.91	311.91	404.74	300.92	248.16	319.88	275.49	345.53	473.76	308.22	573.04	578.55	386.02	411.8
Ifnb1	20	20	20	20	20	20	20	20	20	20	20	20	20	20	20	20	20	20	20	20	20	20	20	20	20
Ifng	20	20	20	20	20	20	20	20	20	20	20	20	20	20	20	20	20	20	20	20	20	20	20	20	20
Ifngr1	2674.08	2565.3	3578.02	3678.24	3272.87	2886.15	4202.23	4058.65	4937.04	4205.05	3446.62	4719.39	2782.07	3135.6	2898.7	3176.77	3347.85	2661.06	3596.51	4392.52	2886.02	4814.99	4344.12	3505.67	4598.99
Ifngr2	1319.09	1101.65	1266.01	1284.21	1247.3	1196.82	1871.01	1609.44	2223.23	1740.48	1580.14	1419.04	1247.64	1412.72	1495.52	1557.86	1403.12	1210.56	1663.97	1630.67	1788.26	1620.51	1510.72	1583.91	1497.64
Igf2r	628.71	679.51	765.14	697.53	749.31	800.8	738.6	605.29	592.67	651.14	641.25	592.34	459.49	412.5	420.46	488.49	490.69	581.58	392.77	324.25	350.8	327.24	331.17	321.15	407.04
Ikbkap	357.16	366.81	347.29	303.93	319.64	328.34	291.97	352.98	244.58	235.12	262.15	254.86	337.03	436.53	338.02	312.35	309.32	396.94	306.26	285.64	246.67	322.18	320.2	321.79	303.94
Ikbkb	278.91	256.17	296.09	321.36	287.22	248.14	303.28	300.74	315.48	313.99	267.79	313.45	241.78	255.1	332.25	323.31	282.61	272.52	361.46	334.15	285.55	340.39	305.73	337.21	395.12
Ikbke	191.47	132.29	134.21	165.66	173.72	135.35	184.84	184.77	289.25	223.29	169.39	169.91	211.43	300.84	313.28	262.25	249.07	211.3	389.59	324.75	356.82	361.63	371.07	375.1	514.31
Ikbkg	516.41	353.59	416.47	321.36	396.08	439.88	506.98	370.82	482.08	436.23	378.3	346.26	231.32	271.38	296.8	349.93	261.49	371.26	316.87	307.92	248.99	353.03	259.85	288.39	345.06
Ikzf1	25.77	24.05	20	20	32.43	31.33	28.67	20	31.19	26.12	45.17	26.95	43.96	103.12	58.53	49.32	39.75	49.37	103.5	108.41	72.2	124.42	112.72	94.42	91.78
Ikzf2	401.34	244.14	282.26	298.94	311.54	265.68	336.48	249.76	347.38	233.15	275.86	266.58	253.3	263.63	350.38	402.38	352.8	288.32	356.68	369.3	414.21	456.72	456.36	337.21	414.78
Ikzf3	20	20	20	20	26.64	20	20	20	25.52	20	20	20	24.07	89.17	45.34	47.75	32.92	53.32	49.89	76.73	37.02	122.9	90.27	61.66	53.04
Ikzf4	57.99	48.11	76.1	62.28	74.12	61.41	64.13	70.09	38.99	48.8	56.46	64.45	50.24	75.21	62.66	63.41	67.7	48.38	78.55	54.45	64.79	92.05	76.31	79	81.05
Il10	20	20	20	20	20	20	20	20	20	20	20	20	20	20	20	20	20	20	20	20	20	21.24	20	20	20
Il10ra	69.96	62.54	78.87	66.02	98.44	93.99	153.91	117.24	121.23	90.2	101.63	110.73	116.18	209.35	146.75	114.29	114.91	135.27	307.32	399	202.24	478.97	466.33	303.17	319.43
Il10rb	1045.7	1367.44	1260.47	1852.2	1643.38	1369.76	1446.26	1655.32	1647.57	1780.41	1455.92	1677.42	1387.9	1108.78	1430.39	1272.12	1554.05	1096.02	1499.43	1448.99	1316.2	1529.97	1348.12	1778.53	1750.92
Il11ra1	53.39	48.11	40.12	31.14	46.33	46.37	31.69	35.68	24.1	28.1	43.56	26.95	25.12	30.24	20	36.01	20	40.48	23.88	20	20	22.76	20	20	20
Il12a	20	20	20	20	20	20	20	20	20	20	20	20	26.17	20	20	20	20	20	20	20	20	22.76	20	20	20
Il12b	20	20	20	20	20	20	20	20	20	20	20	20	20	35.67	20	23.49	20	23.7	55.73	73.76	67.11	127.46	104.74	70.01	70.92
Il12rb1	20	20	20	20	20	20	20	20	20	20	20	20	20	37.22	23.08	27.4	20	29.62	34.5	46.04	20	57.15	50.37	26.98	47.68
Il12rb2	20	20	20	20	20	20	20	20	20	20	20	20	20	27.14	22.26	20	20	20	20	23.27	20	20	21.45	20	20
Il13	20	20	20	20	20	20	20	20	20	20	20	20	20	20.16	20	20	20	20	20	20	20	20	20	20	20
Il13ra1	1153.4	1273.63	1419.59	1507.17	1329.53	1337.18	1400.99	1394.09	1357.62	1425.51	1509.16	1721.95	1128.32	1378.61	1263.03	1303.43	1248.46	1107.87	1261.65	1140.08	966.79	1220.94	1191.51	1161.92	1560.21
Il15	25.77	57.73	27.67	28.65	42.85	36.34	49.04	29.31	41.12	31.05	42.75	28.12	20	28.69	20	25.05	25.47	41.47	30.78	34.16	28.69	36.42	30.42	28.9	33.97
Il15ra	85.61	54.12	58.11	62.28	69.49	67.67	55.07	48.42	44.66	39.43	44.36	76.75	59.66	93.82	93.99	103.34	67.7	99.73	52.55	70.3	48.59	79.91	84.79	70.65	91.78
Il16	62.59	61.34	70.56	38.61	61.38	53.89	111.66	70.09	81.53	70.98	70.98	72.07	81.64	191.52	109.65	79.07	101.86	81.95	183.12	163.86	89.32	300.94	291.77	184.34	198.45
Il17a	20	20	20	20	20	20	20	20	20	20	20	20	20	22.49	28.86	20	20	22.71	20	20	55.54	20	20	20	22.05
Il17b	20	20	20	20	20	20	20	20	20	20	20	20	20	20	20	20	20	20	20	20	20	20	20	20	20
Il17f	22.09	20	20	20	31.27	27.57	31.69	25.49	38.99	45.35	33.07	43.36	35.59	51.95	23.91	37.58	25.47	37.52	39.81	70.3	61.55	59.18	57.86	39.18	71.51
Il17ra	165.69	187.62	221.38	234.17	228.15	241.87	270.84	251.04	297.75	256.32	242.79	252.52	238.64	259.75	187.97	210.58	238.51	215.25	283.43	300.49	222.61	360.62	308.23	289.03	324.8
Il17rb	38.66	26.46	52.58	34.88	34.74	43.86	24.14	31.86	47.5	26.62	28.23	44.53	28.26	77.54	32.15	42.27	29.81	55.29	30.25	32.18	24.53	38.44	33.42	25.05	42.91
Il17re	454.73	491.89	452.44	330.08	491.05	558.93	481.33	397.58	296.34	328.77	392.01	383.18	310.86	353.57	280.31	349.93	337.89	652.68	212.31	130.69	234.18	175	163.09	145.8	161.5
Il18	1163.52	1211.09	1689.39	1803.62	1667.71	1567.77	1992.47	1641.3	1447.65	1644.36	1661.6	1801.63	991.21	527.25	1003.33	912.79	934.17	1090.1	836.5	614.35	686.79	662.06	502.24	714.88	556.62
Il18r1	192.39	185.21	229.68	348.77	296.48	122.81	371.18	433.26	438.12	478.62	249.24	401.92	279.46	424.9	305.86	325.66	318.64	235	631.62	541.08	504.91	652.96	675.81	627.53	809.9
Il18rap	20	20	20	20	20	20	24.14	20	36.86	23.66	20	36.33	36.63	69.78	45.34	81.42	54.04	41.47	119.42	136.63	128.66	153.25	189.53	122.68	175.81
Il19	20	20	20	20	20	20	20	20	20	20	20	20	20	20	20	20	20	20	20	20	20	20	20	20	20
Il1a	20	32.47	20	20	20	20	39.99	20	57.42	20	30.65	21.68	25.12	22.49	23.91	20	20	66.16	380.03	356.93	467.43	148.7	223.94	301.88	787.85
Il1b	52.47	78.17	20	20	53.27	32.58	40.74	20	43.25	20	41.14	20	121.41	222.53	126.96	281.82	83.23	179.71	120.49	295.54	454.93	122.4	211.47	157.36	147.2
Il1r1	506.28	369.22	518.85	341.29	463.25	330.85	625.43	471.49	550.84	504.25	451.7	592.34	332.84	562.92	385.01	410.21	373.92	418.66	529.18	364.35	509.08	442.55	458.85	386.66	508.35
Il1r2	23.01	95.01	85.78	42.35	26.64	68.93	109.39	20	34.74	20	75.82	96.09	50.24	133.36	68.43	84.55	58.39	86.89	86.52	110.39	107.83	120.88	148.63	77.08	125.15
Il1rap	81	114.25	131.44	108.37	67.17	115.3	109.39	86.65	70.89	82.32	105.67	122.45	69.08	97.7	72.55	79.85	78.26	113.55	65.82	81.68	91.63	81.94	86.28	72.58	76.28
Il1rl1	236.57	132.29	138.36	288.98	167.93	117.8	115.43	118.51	82.95	182.38	104.05	194.52	463.68	972.31	312.46	362.46	657.15	181.68	114.65	100.49	103.67	96.6	161.1	131.03	156.14
Il1rl2	36.82	66.15	88.55	64.77	39.38	56.39	86.76	40.78	73.02	53.23	54.04	76.17	36.63	59.7	40.4	28.97	59.01	76.03	81.21	82.18	108.76	76.37	82.29	68.08	113.23
Il1rn	26.69	279.02	225.53	139.51	38.22	124.07	343.27	242.12	384.24	241.04	266.99	302.32	139.21	455.92	300.09	214.5	176.4	391.01	501.05	572.76	771.02	485.04	776.06	590.27	786.66
Il2	20	20	20	20	20	20	20	20	20	20	20	20	20	20	20	20	20	20	20	20	20	20	20	20	20
Il20	20	20	20	20	20	20	20	20	20	20	20	20	20	20	20	20	20	20	20	20	20	20	20	20	20
Il21	20	20	20	20	20	20	20	20	20	20	20	20	20	20	20	20	20	20	20	20	20	22.76	20	20	23.24
Il21r	20	20	20	20	20	20	20	20	20	20	20	20	20	38.77	20	21.92	20	44.43	54.14	85.64	32.4	113.8	107.73	52.67	69.73
Il22	20	20	20	20	20	20	20	20	20	20	20	20	20	20	20	20	20	20	20	20	20	20	20	20	20
Il22ra2	20	20	20	20	20	20	20	20	20	20	20	20	20	20	20	20	20	20	20	20	20	20	20	20	20
Il23a	20	20	20	20	20	20	20	20	20	20	20	20	20	20	20	20	20	20	20	20	20	20	20	20	20
Il23r	20	20	20	20	20	20	20	20	20	20	20	20	20	21.71	20	20	20	20	20	20	20	20	20	20	20
Il25	20.25	20	20	20	20	20	20	20	20	20	20	20	20	20	20	20	20	20	20	20	20	20	20	20	20
Il27	20	20	20	20	20	20	20	20	20	20	20	20	20	20	20	20	20	20	20	20	20	20	20	20	20
Il27ra	28.54	20	20	20	20	31.33	22.63	29.31	28.36	30.07	32.26	29.29	40.82	109.33	59.36	70.46	54.04	50.36	118.89	108.41	63.4	170.95	114.71	96.99	108.46
Il28a	20	20	20	20	20	20	20	20	20	20	20	20	20	20	20	20	20	20	20	20	20	20	20	20	20
Il2ra	24.85	20	51.19	20	20	20	29.42	61.17	47.5	33.03	33.88	46.87	41.87	87.62	41.22	52.45	42.86	30.61	102.97	137.62	58.31	136.05	137.66	114.33	110.85
Il2rb	39.58	51.71	49.81	34.88	78.75	65.17	75.44	59.89	81.53	57.67	89.53	95.5	202.01	480.73	278.66	313.14	178.88	243.89	458.59	514.84	226.77	598.84	529.17	405.93	497.62
Il2rg	43.26	49.31	65.03	51.07	68.33	57.65	70.16	59.89	100.67	80.35	97.6	84.95	147.58	341.16	212.7	188.67	159.63	116.51	398.08	414.85	203.63	525	567.58	371.89	367.11
Il3	20	20	20	20	20	20	20	20	20	20	20	20	20	20	20	20	20	20	20	20	20	20	20	20	20
Il33	437.24	982.58	506.4	1072.46	500.31	1008.84	773.3	683.03	1135.72	2396.55	1755.17	1387.4	1152.39	945.18	1052.8	648.98	767.71	964.7	2145.38	1683.64	2292.24	2560.75	1310.22	3232.05	2581.68
Il4	20	20	20	20	20	20	20	20	20	20	20	20	20	20	20	20	20	20	20	20	20	20	20	20	20
Il4ra	804.52	880.35	1207.89	848.25	932.29	834.64	1267.46	1173.63	1281.76	1267.28	910.66	1838.54	993.3	1166.16	1037.96	1183.66	1094.42	977.53	1349.75	1585.62	1652.19	1902.73	1700.24	1380.94	1998.83
Il5	20	20	20	20	20	20	20	20	20	20	20	20	20	20	20	20	20	20	20	20	20	20	20	20	20
Il6	20	20	20	20	20	20	20	20	20	20	20	20	20	20	20	20	20	20	20	20	26.38	20	20	20	20
Il6ra	602.01	324.72	628.16	315.14	354.39	350.9	499.44	420.52	471.44	411.58	342.81	699.56	221.9	305.5	258.87	299.05	278.26	323.87	419.31	342.57	245.28	399.56	376.56	366.75	360.55
Il6st	867.12	960.93	874.44	935.44	910.29	1080.27	734.07	667.73	659.31	620.58	824.35	822.6	631.15	908.73	585.35	766.4	636.03	975.56	605.08	447.52	407.26	461.77	530.67	486.86	535.17
Il7	27.62	28.86	20	29.89	27.8	35.09	28.67	29.31	34.03	36.48	29.04	29.88	21.98	36.44	37.92	39.14	36.03	26.66	43.52	45.05	36.1	37.93	32.42	39.18	51.25
Il7r	58.91	40.89	73.33	37.37	63.7	46.37	76.95	53.52	95.71	62.11	66.95	103.12	88.97	323.33	131.91	137.78	101.24	113.55	312.09	309.4	121.72	485.55	407.98	255.63	339.1
Il9	20	20	20	20	20	20	20	20	20	20	20	20	20	20	20	20	20	20	20	20	20	20	20	20	20
Ilf3	160.17	155.14	188.17	210.51	149.4	165.42	182.57	173.31	170.85	165.62	171	121.87	172.7	231.84	170.66	197.28	213.67	205.38	158.7	204.95	177.71	201.8	219.45	138.09	154.95
Irak1	507.2	570.07	635.08	524.4	624.23	632.87	494.16	454.93	507.6	536.78	462.99	458.76	463.68	452.04	477.35	515.89	519.26	580.59	470.79	499	542.86	467.34	461.34	463.1	425.51
Irak2	397.66	329.53	325.15	364.96	448.2	370.95	451.15	400.13	525.32	486.01	384.75	400.75	502.41	458.24	562.26	562.08	444.1	590.47	617.82	606.43	543.79	611.99	634.41	515.77	720.51
Irak3	124.27	119.06	170.18	97.16	98.44	95.24	114.67	113.41	95.71	109.92	104.86	139.44	61.75	117.86	67.6	75.15	78.26	112.56	100.32	92.57	77.29	91.55	108.23	91.85	78.67
Irak4	312.05	371.63	401.25	582.94	409.98	369.7	604.31	536.48	646.55	608.26	479.93	508.56	339.12	410.17	401.5	377.33	403.73	347.57	544.57	472.27	491.96	572.54	567.08	578.07	641.84
Irf1	350.71	546.01	470.43	717.46	872.07	612.82	728.79	625.68	837.26	678.74	751.75	611.09	2729.74	2541.66	3199.62	2417.42	1923.62	2428.03	2081.16	2206.41	1111.64	2505.62	3093.25	2221.71	3793.85
Irf3	46.95	34.88	38.74	37.37	54.43	30.08	29.42	36.95	24.81	21.2	37.91	20.51	20	34.12	22.26	25.05	26.09	47.4	23.88	20	22.68	28.32	27.43	26.98	33.37
Irf4	23.01	39.69	30.44	28.65	41.69	37.6	40.74	39.5	39.7	36.48	51.62	28.71	105.71	243.47	192.09	91.59	142.86	66.16	104.03	68.81	58.78	132.51	171.07	98.91	156.14
Irf5	130.71	188.82	154.96	143.24	106.55	146.63	202.19	166.93	221.9	172.03	213.75	226.74	167.47	315.58	258.87	204.32	182.61	174.77	620.47	757.42	473.44	945.8	889.77	657.07	744.35
Irf7	31.3	114.25	51.19	38.61	49.8	77.7	328.18	203.89	863.49	240.05	248.43	396.07	320.28	631.15	302.57	222.33	178.26	342.63	1020.14	1983.64	562.3	1734.81	1245.38	1185.68	1356.39
Irf8	67.2	64.94	92.7	64.77	75.28	82.71	141.08	146.54	216.93	150.83	134.7	106.05	220.85	298.52	234.96	202.76	168.32	211.3	492.03	721.28	366.54	762.21	856.35	538.89	523.25
Irgm1	211.72	362	265.65	250.36	326.59	266.93	399.85	458.75	732.33	383.98	659	855.41	3301.23	4189.32	3169.94	2512.92	2172.06	2564.29	3197.37	5576.17	846.92	5670.77	5198.48	4562.25	6663.97
Itga2b	21.17	20	20	20	20	20	20	20	20	20	20	20	20	28.69	20	20	20	20	20	20	20	20	20	20	20
Itga4	68.12	66.15	85.78	98.4	84.54	83.97	87.51	103.22	119.1	104	96.79	132.41	117.23	242.69	178.9	144.04	159.63	93.8	263.79	337.12	208.26	438	371.07	269.77	279.5
Itga5	486.95	527.97	470.43	443.43	435.46	343.38	312.34	467.67	1039.3	534.32	344.42	527.31	283.65	348.92	290.2	389.07	319.26	567.76	315.81	667.81	471.13	627.67	393.02	492.64	295.59
Itga6	3394.84	3706.63	3757.89	4377.02	5018.17	3841.09	4935.54	4540.34	5011.48	5252.99	4021.73	4780.91	3979.47	4046.65	4221.91	4762.03	4530.47	3814.35	4220.17	4014.8	3686.66	4434.14	3898.23	4068.96	5461.93
Itgal	34.06	34.88	44.28	42.35	38.22	55.14	92.04	64.99	102.09	75.91	70.17	65.03	197.82	432.66	245.68	174.57	203.73	157	334.92	408.91	174.01	569	480.3	345.56	451.73
Itgam	102.18	119.06	113.46	97.16	98.44	78.95	126.75	150.37	173.69	188.79	152.45	160.54	115.13	149.65	108.82	122.91	117.39	99.73	271.22	345.54	264.26	430.92	401	310.23	320.62
Itgax	78.24	69.75	69.18	64.77	67.17	56.39	86.01	63.72	130.44	105.98	127.44	135.34	136.07	449.71	218.47	205.1	140.37	186.62	453.81	626.72	263.8	783.95	810.97	520.26	700.25
Itgb1	7356.71	7655	8186.84	7737.63	6693.98	6505.42	7719.42	7879.01	7816.04	8315.96	7524	9107.17	5038.71	5622.98	5313.46	5620.02	5718.05	5519.6	6470.11	5895.47	5754.91	6144.17	5583.51	5733.8	6473.26
Itgb2	190.55	188.82	179.87	189.33	185.3	215.55	230.1	254.86	321.86	216.88	291.18	283.57	437.51	873.84	506.2	407.86	406.84	357.44	985.11	1055.93	495.2	1265.96	1266.33	892.8	1038.75
Itln1	24.85	38.49	20	66.02	31.27	20	20	20	20	30.07	20	20	144.44	249.67	458.38	251.29	186.34	20	20	20	22.68	20	27.93	21.84	20
Jak1	1661.52	1723.43	1903.85	2096.34	1891.22	1837.21	1812.16	1814.61	1887.19	1837.58	1751.94	2075.83	1500.94	1801.18	1521.08	1699.55	1693.18	1636.13	1849.74	1720.28	1522.15	1968.48	1719.69	1709.8	1770.58
Jak2	835.82	750.47	899.35	818.36	956.61	719.34	1073.57	934.06	1076.88	1023.78	827.58	1204.02	654.17	760.64	726.32	866.61	742.24	886.69	920.89	1005.43	833.04	1279.11	928.67	910.78	1141.25
Jak3	131.63	168.37	154.96	112.1	169.09	144.12	129.76	98.12	121.23	118.79	116.96	130.65	131.88	371.4	194.57	241.9	139.13	208.34	212.84	222.77	163.37	265.53	265.83	175.35	222.89
Kir3dl1	20	20	20	20	20	20	20	20	20	20	20	20	20	20	20	20	20	20	20	20	20	20	20	20	20
Kir3dl2	20	20	20	20	20	20	20	20	20	20	20	20	20	20	20	20	20	20	20	20	20	20	20	20	20
Kit	175.82	193.63	237.98	140.75	142.45	255.66	165.22	158.01	87.2	109.92	186.33	148.23	128.74	117.86	106.35	186.32	160.87	174.77	84.92	69.31	51.83	81.94	77.81	71.3	48.27
Klra1	20	20	20	20	20	20	20	20	20	20	20	20	20	20	20	20	20	20	20	20	20	20	20	20	20
Klra21	20	20	20	20	20	20	20	20	20	20	20	20	20	20	20	20	20	20	20	20	20	20	20	20	20
Klra4	20	20	20	20	20	20	20	20	20	20	20	20	20	20	20	20	20	20	20	20	20	20	20	20	20
Klra5	20	20	20	20	20	20	20	20	20	20	20	20	20	20	20	20	20	20	20	20	20	20	20	20	20
Klra6	20	20	20	20	20	20	20	20	20	20	20	20	20	20	20	20	20	20	20	20	20	20	20	20	20.86
Klra7	20	20	20	20	20	20	20	20	20	20	20	20	20	20	20	20	20	20	20	20	20	20	20	20	20
Klra8	20	20	20	20	20	20	20	20	20	20	20	20	20	20	20	20	20	20	20	20	20	20	20	20	20
Klrb1	20	20	20	20	20	20	20	20	20	20	20	20	20	20	20	20	20	20	20	20	20	20	20	20	20
Klrc1	20	20	20	20	20	20	20	20	20	20	20	20	23.03	37.99	27.21	25.83	26.09	25.67	27.6	29.7	20	21.24	30.42	25.05	26.22
Klrc2	20	20	20	20	20	20	20	20	20	20	20	20	20	20	20	20	20	20	20	20	20	20	20	20	20
Klrc3	20	20	20	20	20	20	20	20	20	20	20	20	20	20	20	20	20	20	20	20	20	20	20	20	20
Klrd1	21.17	20	20	26.16	24.32	20	21.12	20	51.75	23.17	29.04	38.08	41.87	73.66	51.11	47.75	56.52	33.57	87.05	98.02	66.18	90.03	117.71	77.72	92.97
Klrk1	20	20	20	20	20	20	24.14	20	38.28	20	27.42	24.61	32.45	56.6	34.63	25.83	38.51	24.69	85.99	187.13	54.61	168.93	186.03	98.91	113.23
Lair1	37.74	30.07	20	46.09	64.86	62.66	75.44	57.34	77.98	69.5	66.14	83.78	58.61	96.15	79.15	68.89	60.87	78.01	182.05	182.67	97.65	275.65	226.93	175.99	269.97
Lck	20	25.26	33.21	20	53.27	31.33	36.97	70.09	41.83	30.07	47.59	43.36	128.74	305.5	180.55	135.43	154.04	144.16	277.59	346.04	109.22	547.76	377.06	296.1	336.12
Lcp2	92.05	86.59	74.72	64.77	79.91	66.42	86.76	119.78	103.5	80.35	75.82	55.66	81.64	99.25	76.67	91.59	63.98	85.9	87.05	108.41	85.62	112.79	103.24	89.92	82.84
Lef1	20	20	20	20	20	20	20	42.05	20	20	20	20	20	25.59	20	20	20	20	20	20	20	35.91	25.94	20	20
Lif	44.18	33.67	33.21	32.39	35.9	48.88	52.06	47.15	56.01	44.36	44.36	48.04	29.31	44.97	36.27	46.19	44.72	35.55	57.85	93.07	150.87	110.26	67.33	62.3	100.72
Lilra5	37.74	38.49	40.12	41.1	44.01	67.67	55.83	33.13	75.15	57.18	50.01	66.21	64.89	83.74	75.85	49.32	80.75	100.72	155.52	173.76	93.02	205.35	285.29	170.21	238.38
Lilra6	20	20	20	20	20	20	20	20	20	20	20	20	20	20	20	20	20	20	20	20	20	20	20	20	20
Lilrb3	58.91	54.12	47.04	48.58	69.49	47.62	76.95	89.2	126.19	80.84	66.14	81.44	56.52	143.44	84.92	96.29	55.28	93.8	173.56	180.2	143	220.01	232.42	177.27	235.4
Lilrb4	74.56	66.15	105.15	105.88	78.75	80.21	132.78	109.59	134.7	114.85	82.27	159.95	122.46	240.36	98.93	123.69	110.56	156.01	307.32	307.92	257.78	450.14	453.86	307.66	502.39
Litaf	337.83	441.38	482.88	510.69	477.15	446.14	489.63	526.29	518.23	531.36	504.13	628.08	713.84	738.15	671.09	603.57	676.4	420.64	785.54	727.22	632.65	853.24	828.42	807.37	918.96
Lta	20	20	20	20	20	20	20	20	20	20	20	20	20	38.77	20	21.92	20	20.74	34.5	32.18	22.21	47.04	56.36	41.11	44.1
Ltb	34.98	32.47	42.89	44.84	69.49	67.67	83.74	90.48	95.71	68.52	100.83	62.69	143.4	327.98	160.76	142.48	118.63	128.36	357.21	403.46	200.39	673.69	594.51	475.3	334.33
Ltb4r1	46.95	63.74	73.33	47.33	44.01	68.93	92.8	81.56	145.33	83.3	61.3	65.62	42.91	79.86	65.95	47.75	42.24	59.24	100.85	97.03	127.73	79.91	73.82	69.37	71.51
Ltb4r2	40.5	37.28	63.65	34.88	28.95	47.62	82.23	48.42	83.65	39.93	47.59	29.88	35.59	44.97	39.57	49.32	27.33	67.14	55.2	45.05	62.02	43.5	35.41	49.46	38.74
Ltbr	2087.71	2010.86	2060.2	2408.98	2121.69	2564.07	2423.26	2640.35	2117.6	2024.89	2278.66	2566.81	1934.26	1845.38	1997.6	2101.15	1959.02	2009.37	2100.8	1687.11	1770.67	1717.62	1593.01	1920.47	2143.05
Ltf	20	20	20	20	20	20	20	20	20	20	20	20	20	36.44	52.76	52.45	20	20	20	20	500.29	20	30.42	20	48.87
Ly86	80.08	132.29	161.88	154.45	110.02	155.4	233.88	151.64	315.48	200.12	237.95	268.34	234.46	365.97	333.07	219.98	209.32	159.96	748.92	831.67	469.28	893.71	1091.76	795.17	828.97
Ly96	289.04	256.17	419.23	539.34	355.55	323.33	571.87	517.37	646.55	583.12	432.34	563.05	534.85	355.89	434.48	378.11	450.93	259.69	585.97	504.94	440.58	475.94	501.24	551.09	634.1
Maf	87.45	79.38	136.98	92.17	93.81	80.21	123.73	119.78	105.63	101.05	106.47	104.29	46.05	106.23	78.32	88.46	70.81	99.73	160.82	139.11	139.77	166.4	155.11	100.84	143.03
Map4k1	20	20	20	20	23.16	20	20	20	22.69	20	30.65	20	35.59	74.44	45.34	44.62	29.81	40.48	70.59	95.05	41.65	105.71	101.25	53.95	73.9
Map4k2	233.81	264.59	298.86	194.31	289.53	328.34	205.21	198.79	155.97	141.47	175.84	185.14	207.24	225.63	152.52	225.46	177.64	307.08	158.17	148.02	144.86	158.31	164.09	115.61	146.01
Map4k4	384.77	402.89	532.69	374.92	377.55	439.88	533.39	354.26	539.5	530.87	433.15	439.42	369.48	407.84	380.06	367.94	391.31	413.72	406.04	485.64	507.69	516.4	497.25	432.91	366.51
Mapk1	2096.92	2327.17	2411.64	2839.96	2587.26	2694.41	2361.4	2482.34	2073.64	2219.1	2193.96	2916.59	1808.66	1737.6	1778.3	1896.83	2081.38	2345.09	1790.82	1581.17	1663.3	1631.64	1581.54	1819.63	2181.2
Mapk11	34.06	36.08	20	27.4	30.11	33.84	30.18	20	21.27	22.18	32.26	21.68	28.26	44.2	23.91	22.7	22.36	33.57	42.46	27.23	31.93	38.44	29.43	37.9	36.35
Mapk14	910.38	903.21	900.73	840.78	927.66	1074	1091.67	916.22	983.3	992.73	1034.87	811.47	797.57	863.76	900.28	787.54	774.54	951.86	913.46	824.25	829.34	900.79	825.93	896.01	860.56
Mapkapk2	1125.78	1209.89	1257.7	1114.81	1124.54	1382.29	1311.97	1163.44	1069.79	1103.64	1102.63	1368.07	1128.32	1083.97	898.63	1124.16	1115.54	1304.36	1174.6	1174.24	1068.6	1258.88	1138.15	1160.63	1046.5
Marco	20	20	20	20	20	20	20	20	20	20	20	20	20	20	20	20	20	20	20	20	20	20	20	20	20
Masp1	20	20	20	20	20	20	20	20	20	20	20	20	20	26.36	20	20	20	20	20	20	20	20	20	20	20
Masp2	20	20	20	20	20	20	20	20	20	20	20	20	20	20	20	20	20	20	20	20	20	20	20	20	20
Mbl2	20	20	20	20	20	20	20	20	20	20	20	20	20	20	20	20	20	20	20	20	20	20	20	20	20
Mbp	241.17	247.75	267.04	170.65	251.31	286.99	268.58	196.24	214.81	217.87	255.69	197.45	195.73	193.84	182.2	200.41	185.09	269.56	190.02	165.84	149.95	187.64	170.07	152.22	161.5
Mif	3395.76	3046.36	3286.08	2341.72	2401.96	2539.01	3107.54	2832.77	2695.38	2403.94	3388.54	2911.9	3316.93	4564.6	3773.42	3424.15	3143.5	2988.88	4278.55	3842.03	4355.4	3191.96	3531.65	4356.71	3642.48
Mme	28.54	25.26	20	20	20	20	20	20	20	20	20	20	21.98	20	20	20	20	20.74	28.66	20	20	20	20	20	20
Mr1	205.27	214.08	257.35	256.59	242.05	205.53	260.28	221.73	187.87	227.23	248.43	244.32	160.14	164.38	192.92	151.87	168.32	180.7	187.36	162.37	180.49	192.7	175.06	169.57	167.46
Ms4a1	24.85	20	20	28.65	100.76	20	21.88	20	39.7	20	33.07	30.47	20	34.12	52.76	20.35	21.12	30.61	21.76	20	26.84	64.74	71.32	23.77	41.12
Msr1	32.22	31.27	48.43	43.6	37.06	40.1	60.36	42.05	63.8	73.94	44.36	68.55	52.33	120.18	61.83	54.02	62.11	55.29	131.1	150.99	124.96	226.59	190.02	131.67	241.96
Muc1	10842.7	12269.6	14949.9	14228.4	15148.3	18937.3	16962.1	13445.2	12630.4	10855.9	18368	17892.1	18619.4	17718	21111.2	21202.5	18244.8	20351.4	15092	15290.4	15691.7	13549.2	15996.9	12098.3	23091.5
Mx1	228.29	229.71	188.17	217.98	267.53	179.21	168.24	126.16	347.38	238.08	218.59	244.32	287.84	636.58	356.98	219.98	273.29	522.34	750.51	1688.1	319.79	1894.64	975.56	880.59	1450.55
Myd88	368.2	380.04	511.94	494.5	479.47	476.22	581.67	509.72	479.95	447.57	508.97	509.73	590.33	642.78	573.8	461.09	511.18	470.99	559.96	592.57	454.01	587.71	644.88	694.97	577.48
Ncam1	544.94	449.8	509.17	369.94	350.91	387.24	371.94	420.52	250.25	263.71	368.62	342.75	279.46	267.5	274.54	284.95	288.82	356.45	205.41	236.14	187.9	289.3	249.38	182.41	158.52
Ncf4	34.98	56.53	52.58	56.05	54.43	37.6	61.11	52.25	75.86	72.95	81.47	75.58	88.97	191.52	120.37	99.42	103.73	103.68	220.8	249.5	148.56	315.6	343.64	228.02	275.93
Nfatc1	145.44	141.92	123.14	93.42	151.71	141.61	142.59	117.24	119.1	108.44	137.93	101.95	100.48	163.6	122.02	135.43	132.92	183.66	141.19	169.8	102.28	188.65	163.59	132.31	124.55
Nfatc2	227.37	233.32	175.72	252.86	340.49	186.73	251.98	221.73	238.91	245.47	236.33	207.41	233.41	223.31	213.53	199.62	218.64	241.91	292.46	343.56	283.23	388.44	339.65	293.53	390.35
Nfatc3	162.01	254.97	233.83	257.84	262.9	254.4	242.93	243.39	259.47	264.2	229.08	228.5	180.03	227.96	218.47	227.02	238.51	210.32	235.13	243.56	233.25	273.12	250.37	256.28	206.2
Nfil3	330.46	239.33	322.38	199.3	337.02	240.62	270.09	207.71	307.68	223.29	216.17	223.81	348.54	434.21	312.46	416.47	424.85	325.84	242.56	369.8	416.06	215.46	201.5	258.2	278.31
Nfkb1	639.75	668.68	666.9	692.55	690.24	721.85	687.29	704.69	724.53	673.32	653.35	643.9	543.23	762.96	591.12	663.85	668.95	816.58	702.21	783.16	735.85	805.2	865.33	701.39	841.49
Nfkb2	714.31	573.67	621.24	571.73	657.82	595.28	734.82	652.44	893.97	775.85	775.15	528.48	601.84	732.72	793.1	806.33	564.6	721.79	913.46	1019.29	632.18	1100.57	965.58	901.15	926.11
Nfkbia	319.42	310.29	462.13	249.12	287.22	329.59	398.34	322.4	448.05	312.01	304.09	492.74	453.21	565.24	638.93	598.87	564.6	543.07	555.72	1113.85	951.05	1171.88	738.15	540.17	579.27
Nfkbiz	1284.11	786.55	998.97	744.87	1304.05	949.93	904.57	625.68	885.46	869.01	864.68	821.43	1443.37	1072.34	1717.29	1704.25	1463.98	1765.48	1172.48	1029.69	2064.08	706.06	1073.81	1081.63	1530.41
Nod2	20	34.88	29.06	31.14	23.16	48.88	23.39	20	29.07	23.17	46.78	20	80.59	59.7	91.51	81.42	63.35	84.92	68.47	105.94	113.39	72.33	100.75	84.78	95.35
Nos2	20	20	20	20	20	20	20	20	20	20	20	20	20	20.16	20	21.14	20	20	20	20	20	20	20.45	20	32.78
Notch1	347.03	479.87	391.56	357.49	420.4	488.75	433.05	356.8	356.6	314.97	442.83	377.32	353.78	422.58	392.43	353.06	328.57	438.41	377.38	357.92	468.82	377.31	422.44	387.31	379.62
Notch2	507.2	571.27	648.91	477.06	425.03	521.34	682.01	570.89	494.84	496.36	601.73	558.36	367.38	517.95	476.52	426.65	415.53	488.77	643.3	635.14	555.82	677.23	654.36	517.69	561.99
Nox1	20	20	20	20	20	20	20	20	20	20	20	20	743.14	610.22	1104.74	1103.02	1075.16	82.94	200.63	192.08	295.73	120.37	547.63	278.12	337.31
Nox3	20	20	20	20	20	20	20	20	20	20	20	20	20	20	20	20	20	20	20	20	20	20	20	20	20
Nox4	49.71	70.96	77.48	51.07	26.64	56.39	52.06	75.18	51.75	64.08	50.82	77.34	36.63	37.22	21.44	27.4	44.72	26.66	51.48	44.06	64.79	54.12	51.37	54.6	33.97
Npc1	548.62	648.24	639.23	566.75	714.57	701.8	617.89	570.89	433.87	461.37	524.29	588.24	422.86	491.58	391.6	435.26	432.3	656.63	466.55	387.62	380.88	441.54	466.83	430.34	591.19
Nt5e	1656.92	1248.37	2523.71	2022.85	1837.95	1812.14	4497.21	3301.72	4051.58	3219.72	2581.94	3878.63	1244.5	679.22	1066.81	1348.84	1371.44	1313.25	1900.69	1609.39	1954.4	2178.89	1386.53	1293.59	2285.49
Oaz1	7179.97	7986.93	8492.62	8068.96	7234.83	8853.94	8147.95	8587.52	7730.96	8748.24	7641.76	8056.66	8804.66	6587.54	7529.53	8329.44	7757.82	7806.43	7362.34	7901.88	7942.1	7459.19	7480.26	7033.82	5122.83
Pax5	20	20	20	20	26.64	20	20	20	20	20	20	20	20	20	20	20	20	20	20	20	20	28.32	29.43	20	20
Pdcd1	20	20	20	20	20	20	29.42	28.03	45.37	20	27.42	35.15	30.35	71.33	32.15	56.36	29.81	29.62	80.68	158.91	62.94	168.93	200.5	55.24	122.77
Pdcd1lg2	20	20	20	20	20	20	20	20	20	20	20	20	20	76.76	24.73	25.05	20	23.7	38.22	35.15	24.07	63.22	53.87	36.61	52.44
Pdcd2	196.07	158.75	189.55	201.79	180.67	192.99	197.66	183.5	188.58	204.07	207.3	168.15	170.61	157.4	189.62	194.93	188.2	212.29	196.92	204.95	177.25	183.6	183.54	174.71	169.85
Pdgfb	474.06	499.11	470.43	412.29	530.42	587.76	643.54	551.77	554.39	483.06	454.12	477.51	252.25	356.67	250.63	228.59	232.3	443.35	512.73	280.69	342.47	357.08	380.55	451.54	396.91
Pdgfrb	179.5	151.54	174.34	102.14	135.5	170.44	200.68	108.32	180.07	174.49	186.33	118.94	113.04	153.52	105.53	137	102.49	170.82	175.69	164.35	142.08	170.45	204.49	113.69	134.69
Pecam1	1147.87	1403.52	1577.32	1231.89	1231.09	1473.78	1390.43	1143.05	1005.27	1099.69	1123.6	1484.07	878.16	1088.62	743.64	876	1040.38	932.11	704.33	680.68	713.64	723.26	764.09	712.31	728.85
Phlpp1	327.7	357.19	366.66	379.91	416.93	451.16	479.07	398.86	390.62	336.17	340.39	414.23	253.3	302.39	285.25	297.48	327.33	480.87	289.8	307.92	367.46	340.89	262.84	312.16	296.79
Phlpp2	156.49	184.01	160.5	181.86	165.61	179.21	149.38	108.32	106.34	127.17	137.93	155.85	125.6	174.46	134.38	160.48	145.96	141.2	159.23	140.1	109.68	167.41	142.14	171.49	162.1
Pigr	305.61	631.4	676.59	1013.91	858.17	141.61	310.07	957	1151.31	1546.77	372.65	601.72	14100.9	20303.8	16696.4	13950.2	15719.4	8466.02	5244.03	8136.03	10589.8	5117.45	14021.9	5117.84	9030.51
Pla2g2a	23.01	44.5	20	59.79	48.64	20	20	20	20	56.19	20	47.46	20	20	28.03	25.05	20	20	20	20	20	20	20	20	20
Pla2g2e	20	20	20	20	20	20	20	20	20	20	20	20	20	20	20	20	20	20	20	20	20	20	20	20	20
Plau	519.17	589.31	507.79	721.2	677.51	461.18	460.21	383.57	423.24	486.01	505.74	448.8	735.82	541.98	516.92	781.28	606.22	483.83	366.23	356.93	637.27	327.24	387.53	398.87	388.56
Plaur	804.52	443.79	405.4	683.83	620.76	297.01	961.91	1194.02	1273.96	1690.7	675.13	972.59	1980.32	539.66	1483.98	1780.18	1197.52	658.6	4090.66	3356.39	3538.1	3009.37	3336.64	4205.13	4690.76
Pml	375.57	485.88	391.56	520.66	506.1	454.92	623.92	526.29	760.69	745.78	595.27	643.31	570.44	615.64	614.2	501.8	509.94	457.17	1022.27	1119.79	782.59	1073.26	939.15	1050.8	1180.59
Polr1b	121.51	149.13	118.99	127.05	150.56	140.36	107.88	121.06	120.52	140.48	129.06	95.5	142.35	178.34	151.7	152.65	178.26	179.71	127.39	130.2	152.72	122.4	137.16	123.32	121.57
Polr2a	949.96	1066.77	1119.34	1173.35	1246.15	1140.42	1295.37	1214.41	1242.77	1193.84	996.16	1157.73	915.84	1090.17	943.15	1055.27	1010.57	1168.1	964.41	1057.41	1006.13	1077.81	1040.89	975.65	1051.26
Pou2f2	23.93	32.47	38.74	51.07	59.06	42.61	67.9	58.62	78.69	49.29	69.37	48.63	63.85	104.67	90.69	57.15	75.16	83.93	128.45	138.61	122.64	147.69	216.96	132.96	164.48
Pparg	1140.51	1023.47	1018.34	1505.92	1380.49	1147.94	1419.1	1475.64	1831.89	1629.57	1147.8	1134.88	928.4	658.29	1352.07	1298.74	1227.34	777.09	1217.59	1346.52	1346.28	1227.01	922.69	1145.22	1387.98
Ppbp	20	26.46	20	20	20	26.32	20	20	38.99	20	45.17	20	20	20	20	20	20	27.65	20	30.2	3448.32	21.24	25.44	20	53.64
Ppia	15714.9	16224	15538	18049.9	16142	17999.9	15339.3	15806.5	14115.6	15111.8	16112.7	19849	15074.3	13868.3	14709.5	15823.6	15408.8	14836.8	14525.1	14331	14299.1	13125.4	13726.1	14163.3	17680.8
Prdm1	125.19	315.1	265.65	337.56	189.93	228.08	365.9	175.85	378.57	226.74	289.57	353.3	256.44	290.76	296.8	302.18	290.69	296.22	357.21	411.88	509.08	401.59	289.77	347.48	582.25
Prf1	20	20	20	20	20	20	20	20	20	20	20	20	20	24.81	20	20	20	20	20	20	20	20	20	20	20
Prim1	190.55	223.7	208.93	312.64	238.57	192.99	148.62	166.93	254.51	225.26	197.62	265.41	270.04	357.45	283.6	267.73	287.58	274.5	217.62	225.24	244.82	269.58	277.31	243.43	236.59
Prkcd	5836.95	4073.44	5429.3	5870.49	5974.79	5604.36	8009.88	5976.48	7797.6	6284.66	6360.88	6911.23	3447.76	2683.55	3681.91	3894.64	3676.42	4450.24	4232.91	3484.11	3633.44	4225.26	2922.18	3588.52	4672.29
Psmb10	101.26	81.78	113.46	79.72	90.33	90.23	122.22	118.51	171.56	114.36	129.86	104.88	483.57	630.38	667.79	635.67	475.16	431.5	424.62	732.17	238.34	811.77	832.91	469.52	551.85
Psmb11	20	20	20	20	20	20	20	20	20	20	20	20	20	20	20	20	20	20	20	20	20	20	20	20	20
Psmb5	2155.83	2161.2	2368.75	2397.77	2413.54	2654.3	2476.82	2405.88	2171.48	2255.58	2513.38	2532.24	2404.22	2196.62	2380.13	2429.94	2340.39	2328.3	2082.22	2048.98	1791.03	1864.8	2059.34	2166.47	2446.99
Psmb7	1330.14	1802.8	2025.61	2107.55	1668.86	1936.21	2129.78	2024.87	2004.17	2295.99	1794.69	2436.74	2149.88	1774.82	1736.25	1831.85	2124.24	1691.43	1809.93	2286.6	1876.19	2303.31	2247.87	2163.26	2128.75
Psmb9	90.21	143.12	94.09	94.67	118.13	111.54	139.57	119.78	224.73	103.51	201.65	177.53	1097.97	1807.39	1767.58	1427.9	1019.26	924.21	1026.51	1750.47	408.65	2019.57	1879.79	1179.26	1371.29
Psmc2	2596.75	2724.05	3052.25	2973.23	2918.48	3191.93	3042.65	3128.41	2808.1	2889.46	3015.08	3532.37	2863.71	2852.59	2740.41	2775.18	2893.81	2812.13	2700.57	2854.42	2253.83	3004.31	2871.31	2851.16	3634.13
Psmd7	2579.27	2602.58	2472.52	2624.47	2472.6	2669.34	2451.93	2720.64	2231.03	2294.02	2590	2846.28	2415.74	2696.74	2759.37	2532.49	2384.49	2569.23	2948.44	2664.82	2274.2	2484.37	2539.14	2912.83	3224.12
Ptafr	84.69	159.96	89.93	108.37	137.82	124.07	93.55	107.04	111.3	129.14	126.64	80.27	124.55	267.5	167.36	206.67	107.45	148.11	253.71	275.74	178.64	194.22	289.77	254.99	210.37
Ptger4	166.61	111.85	118.99	170.65	157.51	86.47	150.13	174.58	157.38	173.51	168.58	124.8	165.38	182.99	159.12	139.35	126.71	118.49	259.02	218.81	269.35	273.63	263.84	251.78	269.37
Ptgs2	196.07	134.7	69.18	143.24	118.13	146.63	49.04	87.93	82.24	54.22	81.47	72.65	111.99	67.46	71.73	93.16	52.17	177.73	44.05	35.15	243.43	34.39	38.9	53.31	47.68
Ptk2	766.78	678.31	762.37	712.48	825.75	814.59	777.83	705.96	780.54	679.24	684.81	705.42	622.77	648.98	653.77	726.48	701.87	832.38	563.68	617.32	557.67	644.36	499.75	580.64	620.39
Ptpn2	276.15	343.96	404.01	373.68	356.7	414.81	399.1	442.18	356.6	355.39	336.35	410.71	423.91	987.82	399.02	488.49	430.44	539.12	386.4	484.15	438.27	408.16	453.86	420.06	519.08
Ptpn22	20.25	20	20	20	20	25.06	26.41	26.76	48.21	33.03	28.23	59.76	74.31	148.87	80.79	106.47	65.22	55.29	149.68	230.69	103.2	333.81	249.38	137.45	178.19
Ptpn6	321.26	301.87	330.68	422.26	458.62	510.06	422.49	382.29	457.26	412.57	446.86	403.68	332.84	492.36	392.43	382.03	363.36	471.98	524.93	584.65	439.66	673.19	702.74	501.64	680.58
Ptprc	103.1	117.86	116.22	128.3	165.61	134.09	173.52	124.88	238.91	164.14	200.04	177.53	253.3	610.22	376.77	364.02	300	357.44	703.8	906.92	456.78	1087.93	987.03	613.4	784.87
Rae1	800.84	709.58	796.96	744.87	777.1	817.09	820.83	886.91	777	778.8	819.51	809.12	705.46	680.77	778.26	767.19	749.07	823.5	791.38	746.53	724.28	708.09	693.76	748.28	739.58
Rag1	20	20	20	20	20	20	20	20	20	20	20	20	20	20	20	20	20	20	20	20	20	20	20	20	20
Rag2	20	20	20	20	20	20	20	20	20	20	20	20	20	20	20	20	20	20	20	20	20	20	20	20	20
Rela	573.48	572.47	697.34	636.5	660.13	671.72	678.24	657.54	564.31	533.33	637.22	693.11	491.94	630.38	556.49	657.59	567.08	594.42	606.14	597.52	450.77	583.67	535.16	589.63	730.64
Relb	253.14	268.2	275.34	271.54	280.27	281.97	367.41	326.22	480.66	385.46	369.42	340.41	310.86	469.1	372.64	335.06	290.06	411.75	599.77	657.91	424.39	908.88	674.81	594.13	604.3
Rorc	260.5	318.71	294.71	234.17	419.24	320.82	320.64	434.54	238.2	166.11	239.56	285.92	272.14	328.76	220.95	306.87	268.32	406.81	135.88	110.89	225.85	120.88	118.7	86.71	99.52
Rpl19	27720.2	25737.1	27207.4	27114.1	22638	25193.3	29693.2	36603.1	29907.2	31361.2	29246.6	33758.7	30207.2	26336.2	28389.3	27546.7	27813.8	23991	32178	35468.8	33502	34597.1	32711	32869.7	32041.5
Runx1	653.56	684.32	715.33	956.62	844.28	911.08	1105.25	1018.17	1175.42	1163.77	888.07	1099.73	778.73	776.15	713.96	751.53	827.33	657.61	966.01	951.47	1150.06	878.03	898.75	876.74	1085.83
Runx3	20	20	20	20	20	20	20	20	21.27	20	20	20	57.57	107	57.71	48.54	40.99	45.42	111.99	133.17	61.55	217.48	162.09	145.8	171.64
S100a8	83.77	191.22	95.47	52.31	110.02	35.09	101.85	228.1	670.65	80.35	81.47	81.44	275.28	514.07	239.91	625.49	241.62	156.01	108.28	149.5	14108.4	82.44	185.54	2672.61	1097.15
S100a9	69.04	295.86	190.94	408.55	92.65	181.72	510.76	200.07	604.72	67.04	440.41	217.95	229.22	620.3	413.04	558.95	337.89	434.46	186.3	157.42	10729.1	153.25	249.38	2260.89	1800.98
Sdha	3191.4	4113.13	4502.28	3797.82	3956.17	4866.22	3509.65	3176.84	2453.63	2701.17	3019.12	3658.33	3804.68	2554.84	2600.26	3256.62	3634.19	3672.16	1719.17	1748.99	1901.18	1833.95	1910.21	1553.08	1697.28
Sele	20	20	20	20	20	20	20	20	20	20	20	20	20	20	20	20	20	20	20	20	20	20	20	20	20
Sell	20	25.26	20	20	33.59	25.06	20	66.26	53.88	20	24.2	27.54	27.21	91.49	37.1	59.5	36.65	33.57	52.02	72.77	93.95	76.88	73.32	40.46	42.31
Selplg	20	20	20	20	20	20	20	20	20	20	20	20	20	20	20	20	20	20	20	20	20	20	20	20	20
Serping1	1721.35	1569.48	1624.36	1226.91	1153.5	1100.32	1184.47	1308.71	1177.55	1522.61	1421.24	1274.32	1261.25	1935.32	1518.6	1505.41	1247.83	1425.81	1880.53	2239.58	1258.35	2417.61	2781.03	1703.38	1481.54
Sh2d1a	20	20	20	20	20	20	20	20	20	20	20	20	20	42.65	27.21	22.7	21.12	23.7	26.54	42.08	20	73.84	58.85	44.96	38.74
Sigirr	385.69	330.73	333.45	362.47	430.82	422.33	433.05	467.67	503.35	391.87	402.5	304.08	334.94	291.54	328.12	346.02	336.65	362.38	333.32	281.18	239.27	300.43	235.91	272.98	325.99
Ski	922.35	825.03	788.66	575.46	694.88	827.12	819.32	750.56	801.81	784.23	801.76	560.7	548.46	575.32	639.76	603.57	539.13	706.98	787.67	677.22	648.38	737.42	657.35	619.18	538.15
Slamf1	20	20	20	20	20	20	20	20	20	20	20	20	20	20	20	20	20	20	31.32	42.57	29.62	44.51	46.38	26.98	57.21
Slamf7	30.38	20	33.21	20	41.69	37.6	47.53	35.68	61.68	56.69	57.27	63.28	106.76	229.51	184.67	104.9	131.06	103.68	194.26	331.18	130.05	370.23	406.98	211.96	252.09
Smad3	888.29	762.49	749.92	800.92	1009.89	728.12	947.58	811.73	966.28	983.36	834.83	816.74	575.67	534.23	588.64	713.17	644.1	879.78	869.94	777.22	779.82	775.86	710.72	701.39	864.13
Smad5	770.47	855.1	900.73	856.97	955.46	898.55	903.06	796.44	555.81	646.7	721.91	788.62	519.15	707.91	635.64	654.46	621.12	837.32	642.23	437.12	530.83	534.1	494.26	562.01	593.57
Socs1	26.69	95.01	41.51	41.1	55.59	55.14	52.06	54.8	66.64	50.77	72.59	50.39	241.78	384.58	142.63	166.75	100	220.19	230.89	264.35	93.02	338.87	403.99	246.64	314.07
Socs3	360.84	212.87	217.23	225.45	280.27	181.72	187.1	215.36	212.68	293.28	191.97	178.11	283.65	286.89	282.78	418.82	245.34	221.18	316.87	305.44	535.92	275.14	322.19	352.62	330.16
Spn	21.17	25.26	20	20	49.8	38.85	48.28	48.42	54.59	28.59	41.14	40.43	103.62	252	130.26	142.48	124.22	112.56	194.26	229.2	96.26	336.34	306.73	208.1	219.91
Src	1353.15	1334.96	1362.86	1461.08	1434.92	1337.18	1806.13	1713.94	1661.04	1754.28	1425.27	1409.67	1047.73	1012.63	1213.56	1216.54	1144.73	1165.14	1436.8	1201.47	1207.91	1361.04	1035.41	1292.95	1362.95
Stat1	330.46	603.74	457.98	442.19	509.58	446.14	836.67	584.9	1495.15	724.58	880.81	972	2617.74	4170.71	2726.39	2135.59	1875.79	2423.09	2488.26	4359.85	995.48	4746.71	4751.6	2864.01	4507.21
Stat2	79.16	99.82	67.8	67.26	112.34	91.48	248.96	126.16	418.27	205.55	265.37	281.23	303.54	724.2	403.97	295.13	218.64	491.73	706.46	847.02	288.79	839.59	836.4	759.2	1255.08
Stat3	2461.44	2868.37	3288.85	2773.94	2828.15	2729.5	3119.61	2813.66	2791.8	2765.74	2833.6	3339.02	2438.76	2942.53	2469.17	2661.66	2495.67	2671.92	2263.21	2289.08	1981.24	2324.55	2439.39	2286.58	2928.52
Stat4	20	20	20	20	20	20	20	20	20	20	20	20	20	27.91	20	21.92	20	20	22.29	26.24	20	42.99	44.39	20	20
Stat5a	578.08	422.14	430.3	397.34	604.54	505.04	416.45	322.4	338.16	354.9	383.94	335.13	285.74	363.65	335.54	412.56	346.59	579.61	254.24	231.68	230.94	308.52	301.25	220.31	224.08
Stat5b	646.2	590.51	689.04	691.3	662.45	646.66	643.54	695.77	556.52	525.45	599.31	634.53	646.85	615.64	533.41	664.63	568.95	634.9	579.6	545.54	484.09	658.02	546.63	567.79	591.19
Stat6	1312.65	1427.57	1523.36	1588.13	1553.05	1505.11	1889.12	1809.51	1864.51	1713.37	1670.48	1653.98	1270.67	1249.9	1421.32	1456.87	1357.77	1283.63	1671.4	1465.33	1459.67	1510.75	1382.04	1502.98	1562.59
Syk	247.62	193.63	235.21	235.42	264.05	209.29	313.09	256.13	379.99	288.85	281.5	274.2	208.29	366.75	336.37	316.27	244.72	221.18	401.79	374.25	304.06	429.91	469.82	364.18	392.14
Tagap	29.46	38.49	48.43	24.91	39.38	38.85	61.86	40.78	65.93	47.32	54.85	134.17	64.89	150.42	87.39	75.15	69.57	78.99	202.22	239.11	88.86	396.53	376.06	187.55	323.6
Tal1	23.01	30.07	30.44	31.14	40.53	40.1	44.51	20	31.19	22.67	33.88	34.57	30.35	32.57	32.98	34.45	22.98	23.7	24.42	26.73	20.83	22.25	24.94	24.41	32.18
Tap1	204.35	298.26	276.72	305.17	423.88	342.13	488.88	442.18	777	338.14	580.75	811.47	2626.12	3718.67	2930.03	2483.18	2411.82	2159.46	2745.68	4578.65	1022.79	5217.08	4687.26	3366.93	5634.76
Tapbp	973.9	1178.62	1090.29	1015.16	1269.31	1284.54	1395.71	1132.85	1666.71	1105.61	1301.05	1467.67	1850.53	2574.23	2725.57	2497.27	2098.15	2265.11	2355.04	2743.53	1238.91	2966.89	2688.27	2079.12	3246.76
Tbk1	383.85	316.3	380.49	323.85	368.28	355.91	463.98	361.9	391.33	378.56	325.06	367.94	315.05	390.79	319.88	381.24	327.33	376.2	402.33	432.67	296.19	441.54	406.98	368.68	432.07
Tbp	197.91	173.18	197.86	174.38	180.67	185.48	185.59	184.77	160.93	152.31	166.16	130.07	185.26	205.47	159.12	112.73	132.92	199.46	183.65	129.21	144.86	140.61	180.05	204.89	144.82
Tbx21	20	20	20	20	20	20	20	20	20	20	20	20	20	20	20	20	20	20	20	20	20	20	20	20	20
Tcf4	1666.12	1545.43	1757.19	1474.78	1705.92	1808.38	1736.72	1390.26	1300.9	1382.13	1612.4	1734.84	1056.1	1195.62	1042.08	1348.84	1239.76	1585.77	1138.51	1000.48	951.52	1108.16	984.53	928.12	1005.38
Tcf7	75.48	101.02	85.78	104.63	130.87	124.07	121.46	146.54	107.05	88.23	95.99	104.29	111.99	211.68	145.1	126.04	130.44	99.73	185.77	164.85	147.17	270.08	201	231.87	157.33
Tfrc	1567.63	3291.71	1622.98	1601.83	2084.63	3304.72	4199.96	3113.12	1965.17	2634.63	3401.45	2426.2	4694.36	5425.26	4850.95	4383.92	5388.86	6831.86	4735.55	5256.86	1525.39	2778.74	4000.98	5112.7	6074.57
Tgfb1	295.48	328.33	264.27	293.96	330.07	307.04	355.34	338.96	467.19	439.19	381.52	352.71	335.98	525.7	389.96	410.99	348.45	432.48	730.34	820.29	780.74	907.36	1009.47	720.66	730.64
Tgfb2	120.59	157.55	171.57	144.49	133.18	175.45	167.49	173.31	167.31	172.52	171.81	183.39	118.27	114.75	109.65	102.55	129.19	126.39	113.59	117.33	124.03	126.95	117.21	109.83	77.47
Tgfb3	276.15	382.45	319.61	266.56	304.59	300.77	184.84	196.24	194.96	227.23	237.95	240.22	245.97	223.31	225.89	221.54	265.22	242.9	227.17	203.96	208.26	205.35	186.03	227.37	139.45
Tgfbi	2719.18	2876.79	2768.61	2595.82	2190.02	2361.05	2489.65	2080.94	2810.23	2272.33	2513.38	2644.15	1976.13	2571.13	2065.2	2112.11	2243.49	2922.72	2530.72	3067.78	2099.72	3236.97	3511.7	2558.92	3150.81
Tgfbr1	765.86	899.6	889.66	873.16	840.8	942.42	983.79	792.62	703.97	713.25	849.35	1018.87	693.95	1068.46	801.35	721.78	808.7	893.6	1049.87	985.14	787.68	1343.34	1312.21	1005.84	1309.31
Tgfbr2	1512.4	1528.59	1700.46	1256.8	1329.53	1566.51	2039.25	1678.26	1717.05	1855.33	1685	1634.06	1111.57	1310.37	1121.23	1178.96	1178.89	1531.47	1902.82	2055.91	1454.58	2432.28	2044.38	1684.11	1890.97
Thy1	197.91	236.93	233.83	183.1	162.14	156.65	178.05	197.52	169.44	212.45	198.42	250.76	311.91	430.33	303.39	274.78	275.16	242.9	460.18	430.69	237.42	639.81	537.15	403.36	383.8
Tigit	20	20	20	20	20	20	20	20	20	20	20	20	24.07	48.85	28.03	27.4	21.74	20.74	41.4	63.37	27.77	109.75	117.71	57.16	54.23
Tirap	263.27	244.14	303.01	442.19	352.07	297.01	427.77	433.26	507.6	499.82	332.32	389.03	292.02	300.07	361.93	334.27	294.41	267.59	464.43	382.17	305.45	400.07	390.02	417.49	477.36
Tlr1	37.74	62.54	35.97	68.51	78.75	65.17	58.85	57.34	74.44	52.25	56.46	62.1	71.17	158.95	98.93	79.85	79.5	109.6	166.13	169.3	152.26	215.46	201.99	187.55	230.04
Tlr2	52.47	87.79	73.33	103.38	91.49	92.74	83.74	71.36	75.15	90.2	91.15	46.87	139.21	137.24	187.15	185.53	122.98	115.53	144.37	187.62	123.1	150.72	201.5	142.59	141.84
Tlr3	100.34	97.42	121.76	84.7	110.02	106.52	150.13	132.53	157.38	117.81	129.86	134.17	151.77	203.92	186.32	131.52	156.52	164.9	207	329.2	142.54	343.42	327.18	265.91	306.32
Tlr4	878.17	769.71	1032.18	1169.61	872.07	792.03	1324.8	1123.93	1500.11	1356.01	962.28	1284.28	647.89	731.95	840.1	932.37	809.32	825.47	1295.61	1136.62	935.32	1068.2	925.18	1078.42	1277.13
Tlr5	20	20	20	26.16	25.48	20	20	20	24.1	24.65	20.97	24.61	20	20	20.61	20.35	20	20	23.88	28.22	32.86	27.31	28.43	22.48	20
Tlr8	54.31	42.09	71.95	57.3	34.74	32.58	61.11	59.89	78.69	79.36	70.98	99.02	87.92	151.2	98.93	75.94	80.12	64.18	175.69	231.68	108.76	275.65	280.8	193.97	224.08
Tlr9	20	20	29.06	24.91	41.69	27.57	47.53	38.23	59.55	40.91	42.75	38.08	41.87	68.23	55.24	28.18	46.58	49.37	108.28	212.87	73.12	208.89	229.43	127.18	127.53
Tmem173	47.87	44.5	49.81	66.02	63.7	52.63	42.25	76.46	66.64	73.44	62.11	71.48	94.2	142.67	110.47	103.34	71.43	84.92	149.15	162.37	92.56	182.59	200	181.77	173.42
Tnf	20	20	20	20	20	20	20	20	20	20	25	20	32.45	54.28	43.69	40.71	23.6	38.51	139.06	99.01	211.04	133.52	115.21	116.26	144.22
Tnfaip3	88.37	73.36	106.54	95.91	120.45	105.27	95.81	99.4	102.8	83.8	88.73	130.07	176.89	286.89	227.54	248.94	173.91	195.51	204.35	371.28	355.43	417.27	306.73	212.6	378.43
Tnfaip6	44.18	38.49	33.21	20	27.8	38.85	30.93	29.31	26.23	27.11	29.84	24.02	40.82	72.11	29.68	32.1	24.22	20.74	27.6	40.1	40.26	22.25	20.95	32.11	28.61
Tnfrsf11a	150.96	159.96	177.1	169.4	173.72	195.5	160.7	173.31	134.7	152.8	146.8	205.65	129.79	153.52	127.79	164.4	150.31	136.26	184.18	213.36	176.79	226.59	205.49	199.75	226.46
Tnfrsf13b	20	20	20	20	20	20	21.88	20	20	20	25	20	41.87	62.8	62.66	31.31	33.54	23.7	46.18	39.11	30.08	44	53.87	37.25	47.68
Tnfrsf13c	20	20	20	20	20	20	20	20	20	20	20	20	20	31.79	20	20	20	20	20	20	20	20	20	20	20
Tnfrsf14	160.17	167.17	121.76	149.47	194.57	131.59	144.1	128.7	148.17	144.92	162.93	151.16	323.42	536.56	454.26	479.1	365.84	468.03	461.24	581.18	252.69	650.43	631.42	421.35	591.78
Tnfrsf17	20	20	20	20	20	20	25.65	20	20	20	20.97	20	45.01	62.03	68.43	33.66	54.66	20	28.66	22.77	20.36	30.35	33.92	23.77	32.78
Tnfrsf1b	937.08	626.59	691.81	738.64	784.05	795.79	978.51	751.84	1056.32	878.37	951.79	858.92	747.33	930.44	991.79	1037.27	706.84	859.04	1226.08	1152.46	895.98	1267.98	1121.69	1110.53	1226.48
Tnfrsf4	20	20	20	20	20	31.33	53.57	26.76	56.01	28.59	34.68	38.08	24.07	53.5	32.15	33.66	36.65	35.55	62.63	185.15	75.44	201.3	196.51	94.42	113.83
Tnfrsf8	20	20	20	20	20	20	20	20	20	20	20	20	20	20	20	20	20	20	20	20	20	23.77	20	20	20
Tnfrsf9	20	20	20	20	20	20	20	20	20	20	20	20	20	20	20	20	20	20	20	21.78	20	20	21.45	20	20
Tnfsf10	58.91	139.51	63.65	129.54	128.55	151.64	119.96	108.32	82.24	81.82	120.99	51.56	190.5	300.07	162.41	141.69	162.11	186.62	164.01	226.23	70.81	291.83	207.48	192.05	213.35
Tnfsf11	20	20	20	20	20	20	20	20	20	20	20	20	20	50.4	20	20	20	20	33.44	24.75	21.29	56.14	38.9	39.18	44.7
Tnfsf12	412.39	531.58	517.47	424.75	324.28	452.41	428.52	388.66	286.41	323.35	404.11	431.81	326.56	366.75	286.08	310.01	311.18	198.47	432.05	284.65	230.94	384.39	341.15	368.04	308.11
Tnfsf13b	20.25	20	20	20	20	30.08	29.42	20	37.57	33.03	32.26	31.64	42.91	65.91	65.95	49.32	41.62	35.55	81.21	83.17	27.31	117.85	117.21	61.02	88.2
Tnfsf14	20	20	20	20	20	20	20	20	20	20	20	20	33.49	29.46	26.38	20	20	20	36.09	25.25	20	32.88	36.41	38.54	34.57
Tnfsf15	20	20	20	20	20	20	20	20	20	20	20	20	20	20	20	20	20	20	20	20	20	20	20.95	20	20
Tnfsf18	20	20	20	20	20	20	20	30.58	48.21	52.25	23.39	20	20	20	20	20	20	20	44.05	77.72	43.97	95.59	70.82	59.73	54.83
Tnfsf8	20	20	20	20	20	20	20	20	20	20	20	20	20	20	21.44	20	20	20	21.76	20	20	22.76	22.44	21.2	25.63
Tollip	1424.03	1813.63	2002.09	1556.99	1644.54	2042.74	1685.42	1643.85	1408.66	1347.13	1530.13	1888.93	1365.92	1194.84	1302.6	1459.22	1331.06	1707.23	1288.18	1148.01	1099.15	1126.87	1100.24	1357.82	1454.13
Traf1	20	20	20	20	20	20	23.39	20	46.08	34.01	38.72	20	33.49	104.67	65.13	68.11	37.27	48.38	121.55	161.38	78.68	220.01	195.51	137.45	117.4
Traf2	115.98	122.67	145.28	140.75	116.97	142.87	154.66	159.29	137.53	148.86	145.19	97.84	151.77	181.44	151.7	135.43	131.06	153.05	173.03	147.03	108.76	166.91	181.55	172.14	153.76
Traf3	255.9	271.8	257.35	345.03	319.64	294.5	300.27	285.44	290.66	328.77	276.67	284.75	290.98	366.75	289.38	287.3	296.28	273.51	397.02	388.11	282.31	446.09	396.51	400.79	410.61
Traf4	206.19	185.21	188.17	229.19	249	246.88	186.35	196.24	161.64	193.72	186.33	162.29	170.61	162.83	164.06	176.92	142.24	186.62	173.56	115.35	142.08	127.96	119.2	140.66	173.42
Traf5	175.82	192.43	196.47	188.08	178.35	166.68	188.61	145.27	123.36	126.68	178.26	155.85	128.74	206.25	181.37	169.88	132.92	245.86	228.76	193.07	140.23	214.45	266.33	204.89	253.28
Traf6	312.97	341.56	373.58	340.05	357.86	414.81	412.68	382.29	336.75	336.66	320.22	436.49	271.09	348.92	261.34	327.23	336.03	392	314.75	377.22	315.63	407.15	337.16	322.43	355.19
Trem1	20	20	20	20	20	20	20	20	20	20	20	20	20	20	20	20	20	20	20	20	21.75	20	20	20	20
Trem2	37.74	34.88	37.36	42.35	44.01	40.1	80.73	72.64	58.13	67.53	60.5	90.23	41.87	87.62	41.22	35.23	32.3	55.29	109.34	108.41	90.25	178.03	110.72	94.42	98.33
Trp53	544.02	482.27	459.36	341.29	412.29	388.5	399.1	405.23	437.41	359.83	433.15	288.26	460.54	728.07	565.56	558.17	450.93	579.61	561.03	577.72	545.64	529.55	640.4	519.62	601.32
Tslp	20.25	20	20	20	20	26.32	24.14	20	20	20	20.97	20	20	20	20	20	20	20	20	20	20	20	20	20	20
Tubb5	2691.57	1751.09	1355.94	1225.67	1548.42	1349.71	1238.04	1078.06	1575.97	1113.99	1723.71	1155.39	1664.22	2985.95	2366.94	2372.8	1737.28	1849.41	2214.38	2240.07	1664.23	2252.73	2362.08	2034.8	1834.35
Tyk2	140.84	162.36	131.44	143.24	156.35	137.85	150.13	135.08	178.65	168.58	142.77	120.11	127.69	146.54	176.43	158.13	140.37	191.56	190.55	177.72	163.83	198.77	196.51	167.64	188.32
Tyrobp	533.9	633.81	547.91	518.17	521.16	596.53	768.02	804.08	920.2	702.9	896.94	951.5	883.4	1849.26	1178.11	1062.32	793.17	970.62	2636.88	2373.73	1460.59	2864.21	3023.92	2540.93	2817.08
Ube2l3	1551.06	1373.45	1379.46	1641.69	1663.07	1589.07	1250.86	1187.65	1224.33	1362.91	1414.78	1425.48	1353.36	1334.41	1520.25	1492.88	1532.31	1353.73	1325.87	1103.45	1052.41	1127.38	1089.77	1224.22	1168.07
Vcam1	92.05	75.77	127.29	73.49	69.49	70.18	178.05	113.41	158.09	100.55	136.32	155.85	122.46	280.68	183.85	135.43	137.27	162.92	254.77	254.95	136.06	382.87	401	206.18	369.49
Vtn	97.57	95.01	83.02	64.77	82.23	166.68	65.64	84.1	42.54	63.09	88.73	96.67	70.13	48.85	42.87	94.72	90.06	150.09	20.17	20	27.31	31.86	24.44	20	20
Xbp1	5739.37	6247.87	5779.35	6402.36	7651.76	9229.9	5342.94	5725.44	4205.42	4426.86	5314.71	4958.44	6130.4	6270.41	6254.14	7326.62	6338.55	8564.76	3865.61	3739.56	3705.63	3447.88	3601.48	3426.67	4159.77
Xcl1	20	20	20	26.16	20	20	20	20	20	20	20	20	64.89	89.94	57.71	48.54	40.99	62.21	62.63	42.08	32.86	97.11	113.22	81.57	76.88
Xcr1	20	20	20	20	20	20	22.63	20	48.21	24.65	26.62	27.54	20	31.79	20	20	20	20.74	126.85	259.4	90.71	251.88	269.33	158.65	152.56
Zap70	20	20	20	20	20	20	20	20	20	20	20	20	24.07	63.58	35.45	32.1	32.92	41.47	53.08	59.41	35.17	91.04	72.32	42.39	45.29
Zbtb7b	3012.82	1739.06	2100.32	1844.73	1914.39	2099.13	1708.81	1414.48	1901.37	1758.23	1714.84	1462.98	1171.23	1066.13	1840.95	1943.01	1393.8	1631.2	1384.78	1125.23	1347.67	1001.44	885.78	1172.84	1000.01
Zeb1	540.34	638.62	635.08	474.57	441.25	428.6	479.82	392.49	331.78	399.26	454.92	464.03	340.17	352.79	380.89	349.93	368.95	318.93	447.44	350.99	311.93	444.07	340.15	360.97	292.61
