# Supplementary material for: Sustained Helicobacter pylori infection accelerates gastric dysplasia in a mouse model
Source: Life Sci Alliance. 2020 Dec 11;4(2):e202000967. doi: 10.26508/lsa.202000967 (PMC7768197; doi:10.26508/lsa.202000967)
Supplement: Supplementary file 2 [file LSA-2020-00967_TableS2.xlsx]

## Sheet: Sheet1
Position	Antibody	Clone & Host	Manufacturer & Catalog Number	Dilution	Secondary	Opal Dye
				(Conc.)
1	MHC class II	M5/114.15.2	eBioscience	1:200	ImmPress Rat-HRP	Opal 480
		Rat	14-5321-85	(2.5µg/ml)
2	PD-1	D7D5W	Cell Signaling	01:50:00	Powervision Rabbit-HRP	Opal 650
		Rabbit	#84651	(1.9 µg/ml)
3	CD3	SP7	Thermo	1:400	Powervision Rabbit-HRP	Opal 520
		Rabbit	RM-9107-S
4	F4/80	D2S9R	Cell Signaling	1:4000	Powervision Rabbit-HRP	Opal 540
		Rabbit	20076S	(0.1 µg/ml)
5	CD4	4SM95	eBioscience	1:250	ImmPress Rat-HRP	Opal 570
		Rat	14-9766-32	(2 µg/mL)
6	FoxP3	FJK-16s	eBioscience	1:200	ImmPress Rat-HRP	Opal 620
		Rat	14-5773-82	(2.5 µg/ml)
7	CD163	EPR19518	Abcam	1:500	Powervision Rabbit-HRP	Opal 690
		Rabbit	ab182422	(1.4 µg/ml)
8	CD8α	4SM15	eBioscience	1:1000	ImmPress Rat-HRP	Opal 780
		Rat	14-0808-82	(0.5 µg/ml)
