# Supplementary material for: Sustained Helicobacter pylori infection accelerates gastric dysplasia in a mouse model
Source: Life Sci Alliance. 2020 Dec 11;4(2):e202000967. doi: 10.26508/lsa.202000967 (PMC7768197; doi:10.26508/lsa.202000967)
Supplement: Supplementary file 3 [file LSA-2020-00967_TableS3.xlsx]

## Sheet: Sheet1
Marker	Species	Dilution	Source	Purpose
Hp strain PMSS1	Rabbit	1:1000	Gift from Manuel Amieva (Stanford University) to N.R.S.	Detection of Hp
Collagen VI	Rabbit	1:100	600-401-108; Rockland (USA)	Identification of individual glands
Pan-cytokeratin	Mouse	1:200 or 1:300	C1801; Sigma (USA)	Identification of gastric epithelium
KI-67	Rabbit	1:300	12202; Cell Signaling Technology (USA)	Proliferating cell marker
UEA-I	Lectin from Ulex europaeus	1:2000	L9006; Sigma (USA)	Foveolar hyperplasia marker
GS-II	Lectin from Griffonia simplicifolia	1:1000 or 1:2000	L21415, L21416, L32451; Fisher (USA)	SPEM and mucous neck cell marker
CD44v10 (ortholog of human CD44v9)	Rat	1:25,000	LKGM002; Cosmo Bio (Japan)	SPEM marker
TFF3	Rabbit	1:1000	Gift from Daniel K. Podolsky (UT Southwestern) to E.C. and J.R.G.	Intestinal metaplasia marker
MUC2	Rabbit	1:300	sc-15334; Santa Cruz (USA)	Intestinal metaplasia marker
phospho-p44/42 MAPK (ERK1/2)	Rabbit	1:1500	4370; Cell Signaling Technology (USA)	Shows KRAS activity
TROP2	Goat	1:200	AF1122; Fisher/R&D Systems (USA)	Dysplasia marker
